# Supplementary material
Source: Royal Society of Chemistry journal article supplement (doi:10.1039/d5nj04942c)

## A Visible Light-Promoted C-H Insertion Reaction of Diazoamides with 1,3-Diketone

Selvaraj Hariharan, Sengodagounder Muthusamy\*

### HRMS Spectra for 3, 4, 5, 8, 9, 10 & 12.

#### Spectrum Plot Report

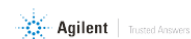

|                |         |              |            |              |                                                   |
|----------------|---------|--------------|------------|--------------|---------------------------------------------------|
| Name           | RN-80   | Rack Pos.    | Instrument | Instrument 1 | Operator                                          |
| Inj. Vol. (ul) | 10      | Plate Pos.   | IRM Status | Success      |                                                   |
| Data File      | RN-80.d | Method (Acq) | GCN-1.m    | Comment      | Acq. Time (Local) 08-11-2024 11:09:47 (UTC+05:30) |

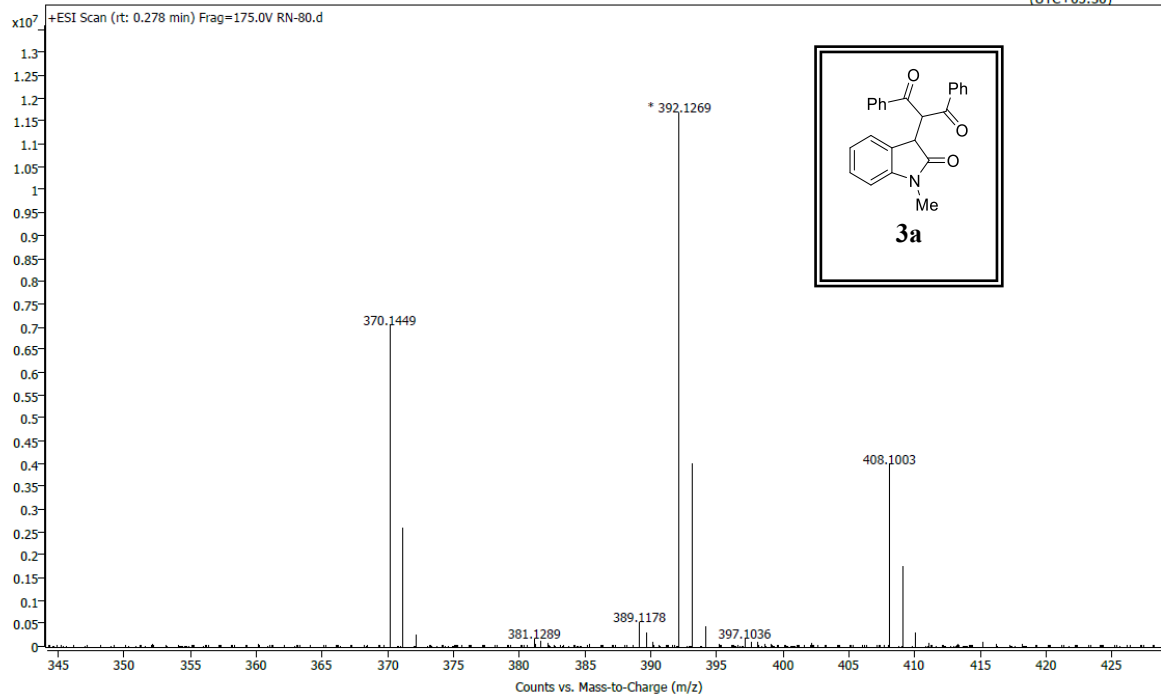

#### Spectrum Plot Report

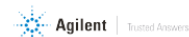

|                |          |              |            |              |                                                   |
|----------------|----------|--------------|------------|--------------|---------------------------------------------------|
| Name           | NKS 58   | Rack Pos.    | Instrument | Instrument 1 | Operator                                          |
| Inj. Vol. (ul) | 10       | Plate Pos.   | IRM Status | Success      |                                                   |
| Data File      | NKS 58.d | Method (Acq) | GCN-1.m    | Comment      | Acq. Time (Local) 27-06-2024 11:08:05 (UTC+05:30) |

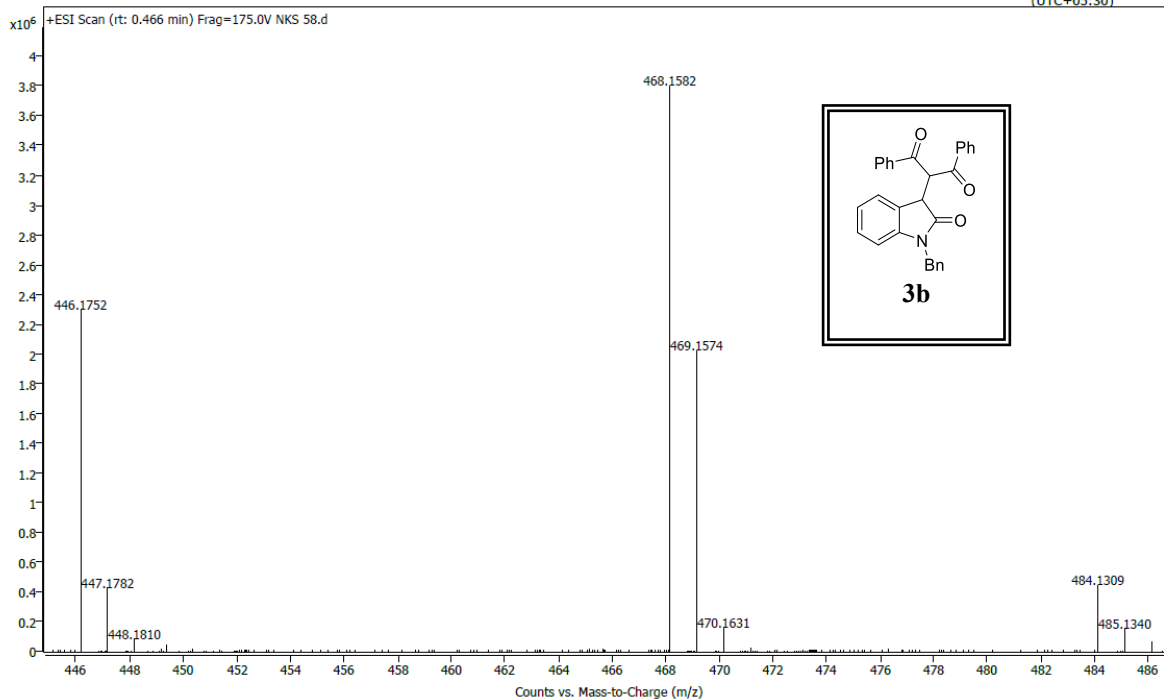

# A Visible Light-Promoted C-H Insertion Reaction of Diazoamides with 1,3-Diketone

Selvaraj Hariharan, Sengodagounder Muthusamy\*

## Spectrum Plot Report

Agilent | Trusted Answers

|                |            |              |               |            |         |                   |                                 |
|----------------|------------|--------------|---------------|------------|---------|-------------------|---------------------------------|
| Name           | KH-122-D   | Rack Pos.    |               | Instrument | QTOF    | Operator          |                                 |
| Inj. Vol. (ul) | 2          | Plate Pos.   |               | IRM Status | Success |                   |                                 |
| Data File      | KH-122-D.d | Method (Acq) | GCN-NORMAL1.m | Comment    |         | Acq. Time (Local) | 30-11-2023 15:16:08 (UTC+05:30) |

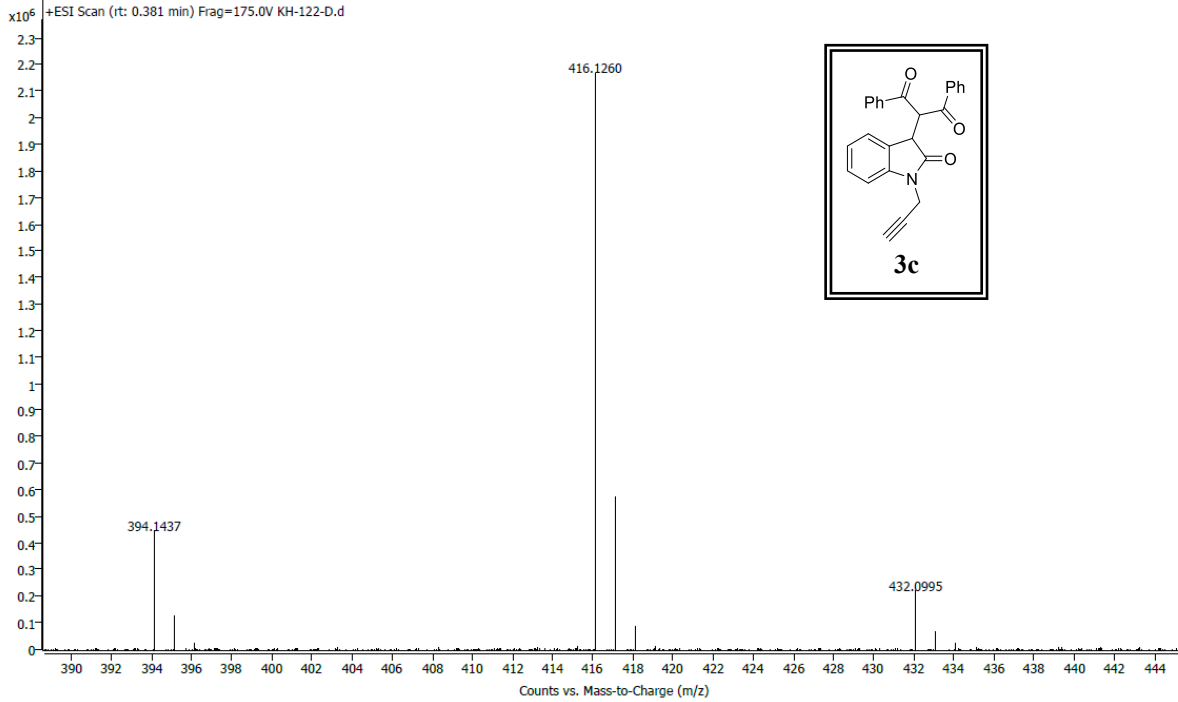

## Spectrum Plot Report

Agilent | Trusted Answers

|                |       |              |         |            |              |                   |                                 |
|----------------|-------|--------------|---------|------------|--------------|-------------------|---------------------------------|
| Name           | NK2   | Rack Pos.    |         | Instrument | Instrument 1 | Operator          |                                 |
| Inj. Vol. (ul) | 2     | Plate Pos.   |         | IRM Status | Success      |                   |                                 |
| Data File      | NK2.d | Method (Acq) | GCN-1.m | Comment    |              | Acq. Time (Local) | 10-05-2024 13:43:54 (UTC+05:30) |

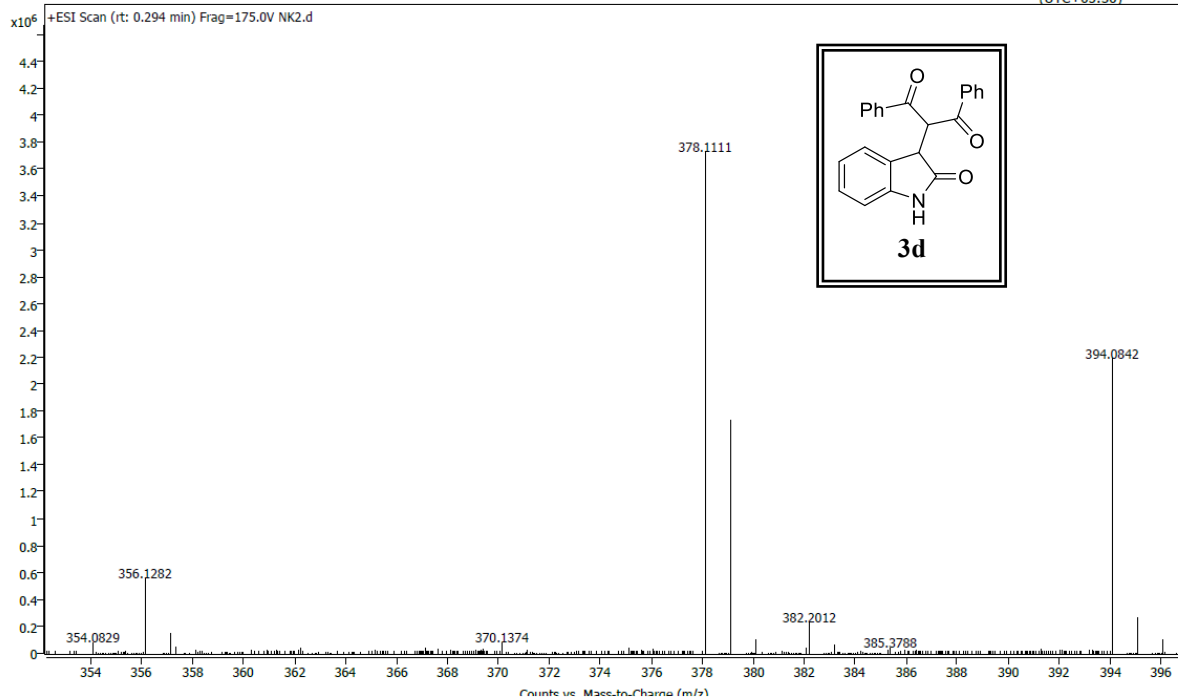

# A Visible Light-Promoted C-H Insertion Reaction of Diazoamides with 1,3-Diketone

Selvaraj Hariharan, Sengodagounder Muthusamy\*

## Spectrum Plot Report

Agilent | Trusted Analyzers

|                |            |              |               |         |                                                   |
|----------------|------------|--------------|---------------|---------|---------------------------------------------------|
| Name           | KH-122-D   | Rack Pos.    | Instrument    | QTOF    | Operator                                          |
| Inj. Vol. (ul) | 2          | Plate Pos.   | IRM Status    | Success |                                                   |
| Data File      | KH-122-D.d | Method (Acq) | GCN-NORMAL1.m | Comment | Acq. Time (Local) 30-11-2023 15:16:08 (UTC+05:30) |

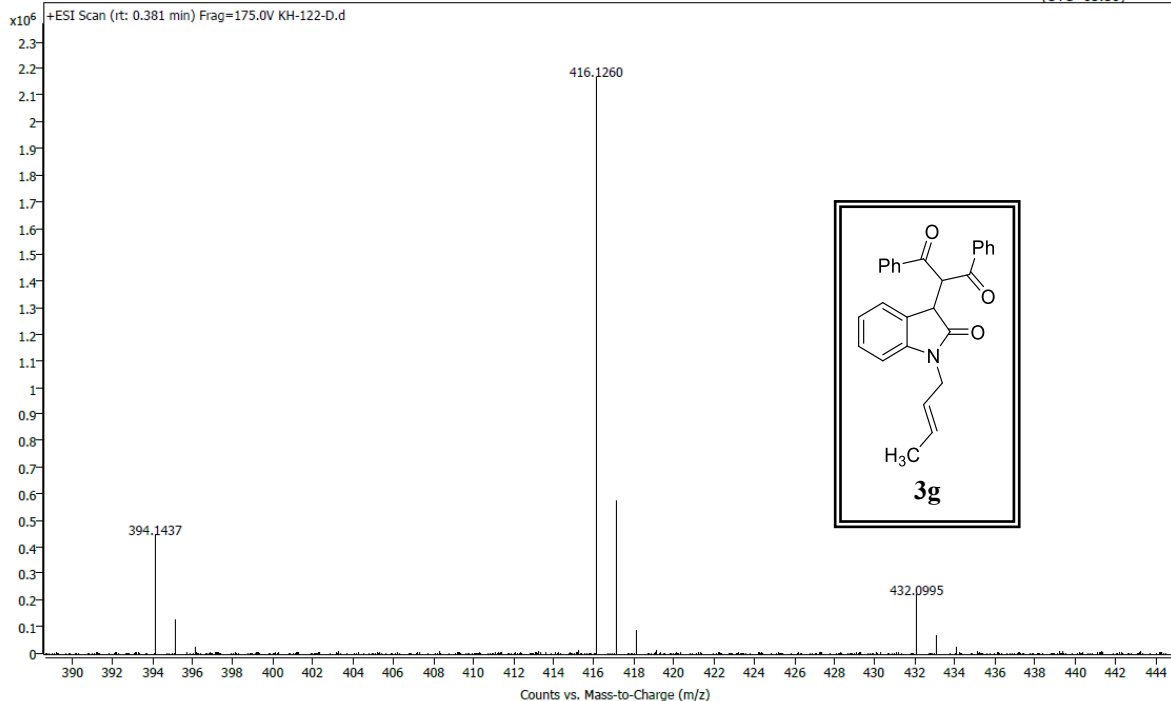

## Spectrum Plot Report

Agilent | Trusted Analyzers

|                |          |              |               |         |                                                   |
|----------------|----------|--------------|---------------|---------|---------------------------------------------------|
| Name           | SHA175   | Rack Pos.    | Instrument    | QTOF    | Operator                                          |
| Inj. Vol. (ul) | 2        | Plate Pos.   | IRM Status    | Success |                                                   |
| Data File      | SHA175.d | Method (Acq) | GCN-NORMAL1.m | Comment | Acq. Time (Local) 11-12-2023 16:54:55 (UTC+05:30) |

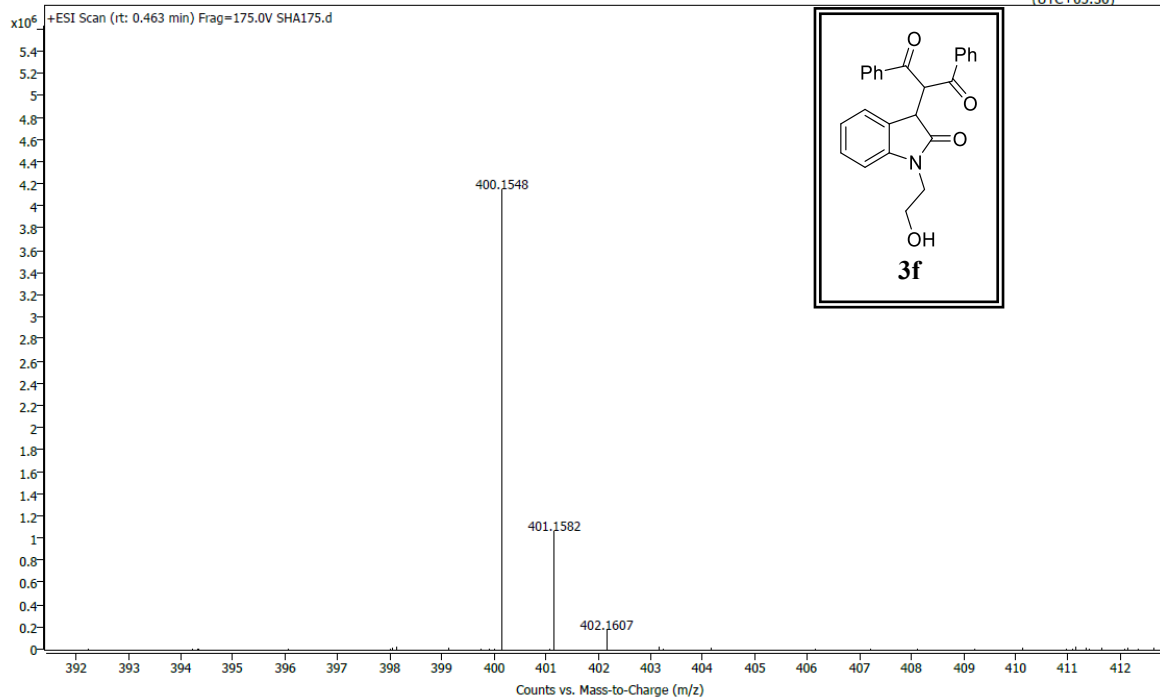

# A Visible Light-Promoted C-H Insertion Reaction of Diazoamides with 1,3-Diketone

Selvaraj Hariharan, Sengodagounder Muthusamy\*

## Spectrum Plot Report

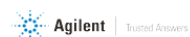

|                |           |              |         |            |              |                   |                                 |
|----------------|-----------|--------------|---------|------------|--------------|-------------------|---------------------------------|
| Name           | NKS 203   | Rack Pos.    |         | Instrument | Instrument 1 | Operator          |                                 |
| Inj. Vol. (ul) | 10        | Plate Pos.   |         | IRM Status | Success      |                   |                                 |
| Data File      | NKS 203.d | Method (Acq) | GCN-1.m | Comment    |              | Acq. Time (Local) | 27-06-2024 11:09:43 (UTC+05:30) |

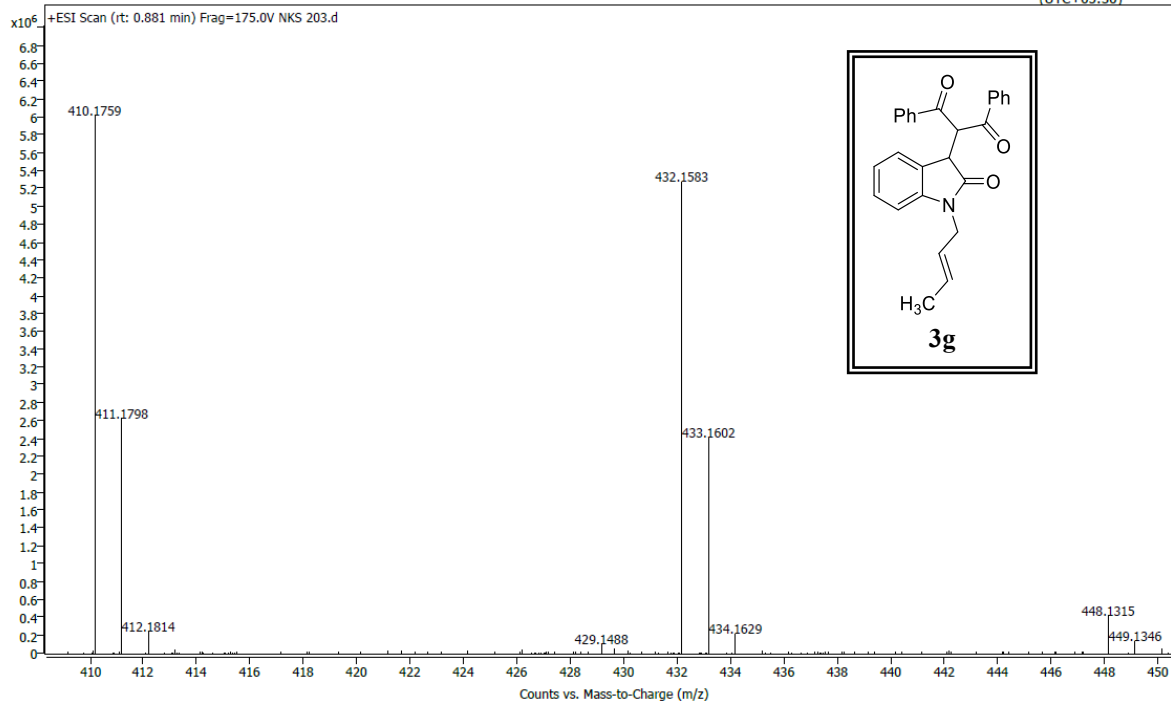

### Acquisition Parameter

|             |            |                      |          |                  |           |
|-------------|------------|----------------------|----------|------------------|-----------|
| Source Type | ESI        | Ion Polarity         | Positive | Set Nebulizer    | 0.3 Bar   |
| Focus       | Not active | Set Capillary        | 3000 V   | Set Dry Heater   | 180 °C    |
| Scan Begin  | 50 m/z     | Set End Plate Offset | -500 V   | Set Dry Gas      | 4.0 l/min |
| Scan End    | 1500 m/z   | Set Charging Voltage | 0 V      | Set Divert Valve | Waste     |
|             |            | Set Corona           | 0 nA     | Set APCI Heater  | 0 °C      |

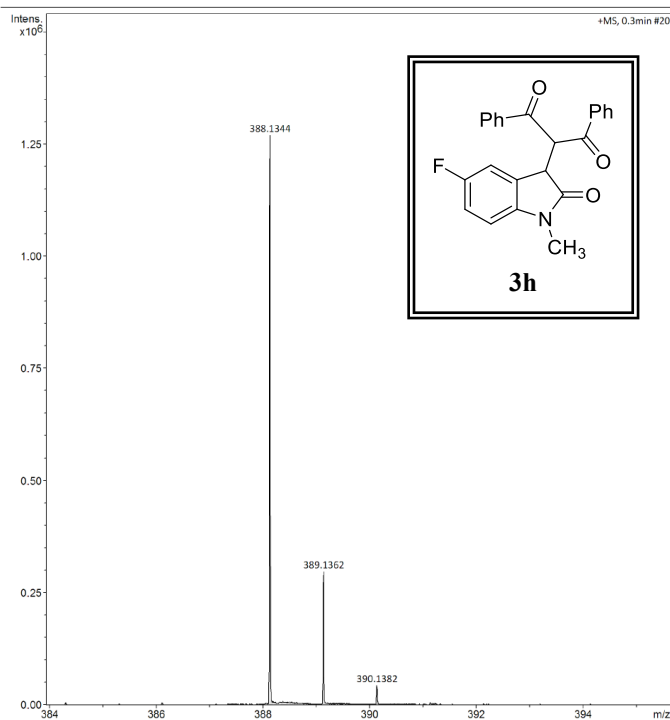

# A Visible Light-Promoted C-H Insertion Reaction of Diazoamides with 1,3-Diketone

Selvaraj Hariharan, Sengodagounder Muthusamy\*

## User Spectrum Plot Report

Agilent | Trusted Answers

|                |            |              |               |            |         |                   |                                 |
|----------------|------------|--------------|---------------|------------|---------|-------------------|---------------------------------|
| Name           | KH-103-A   | Rack Pos.    |               | Instrument | QTOF    | Operator          |                                 |
| Inj. Vol. (ul) | 2          | Plate Pos.   |               | IRM Status | Success |                   |                                 |
| Data File      | KH-103-A.d | Method (Acq) | GCN-NORMAL1.m | Comment    |         | Acq. Time (Local) | 30-11-2023 15:17:50 (UTC+05:30) |

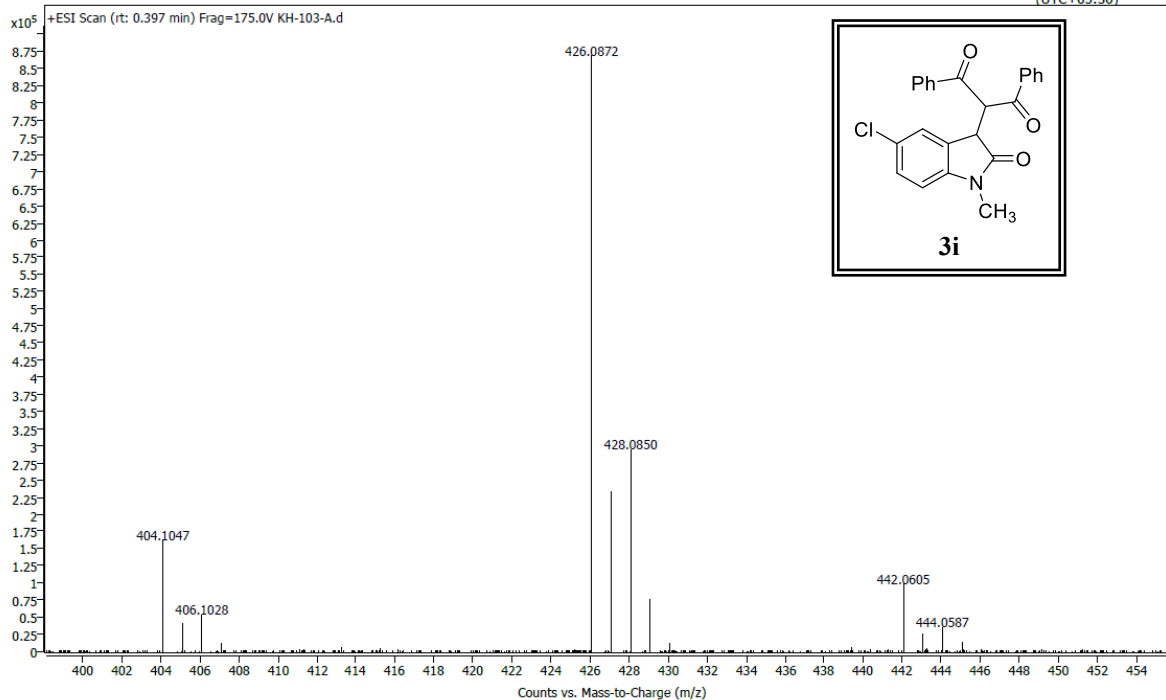

## Spectrum Plot Report

Agilent | Trusted Answers

|                |          |              |         |            |              |                   |                                 |
|----------------|----------|--------------|---------|------------|--------------|-------------------|---------------------------------|
| Name           | SKS121   | Rack Pos.    |         | Instrument | Instrument 1 | Operator          |                                 |
| Inj. Vol. (ul) | 10       | Plate Pos.   |         | IRM Status | Success      |                   |                                 |
| Data File      | SKS121.d | Method (Acq) | GCN-1.m | Comment    |              | Acq. Time (Local) | 11-07-2024 11:54:16 (UTC+05:30) |

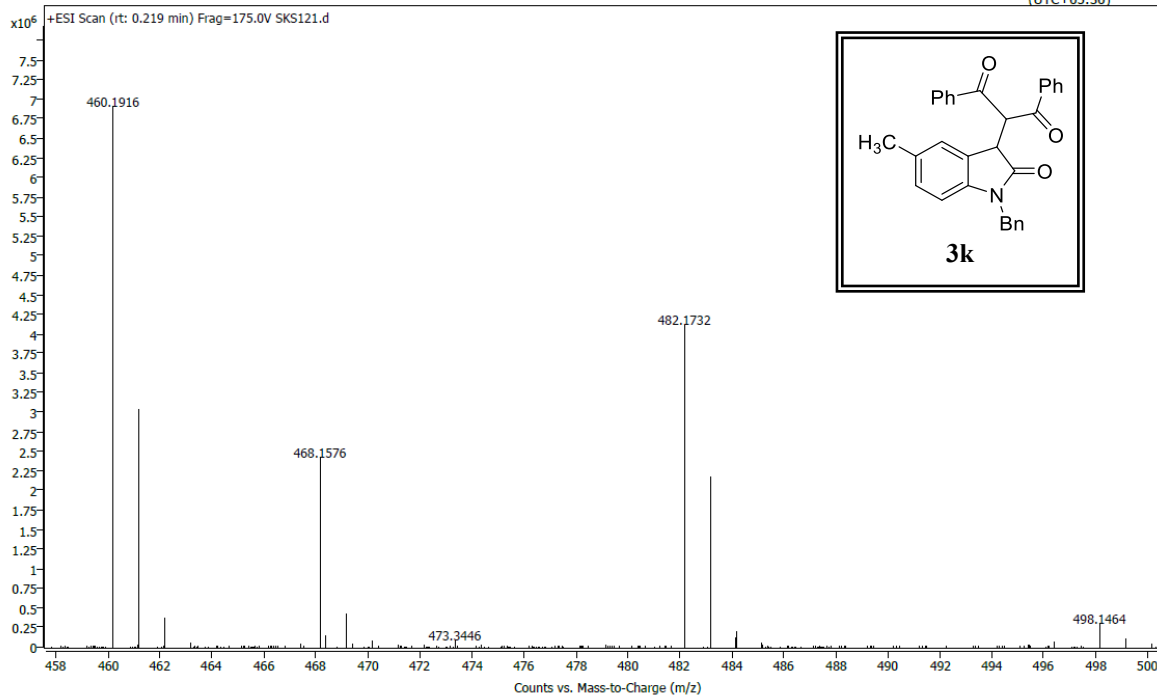

# A Visible Light-Promoted C-H Insertion Reaction of Diazoamides with 1,3-Diketone

Selvaraj Hariharan, Sengodagounder Muthusamy\*

## Spectrum Plot Report

Agilent | Trusted Answers

|                |       |              |         |            |              |                   |                                 |
|----------------|-------|--------------|---------|------------|--------------|-------------------|---------------------------------|
| Name           | NK4   | Rack Pos.    |         | Instrument | Instrument 1 | Operator          |                                 |
| Inj. Vol. (ul) | 2     | Plate Pos.   |         | IRM Status | Success      |                   |                                 |
| Data File      | NK4.d | Method (Acq) | GCN-1.m | Comment    |              | Acq. Time (Local) | 10-05-2024 13:47:14 (UTC+05:30) |

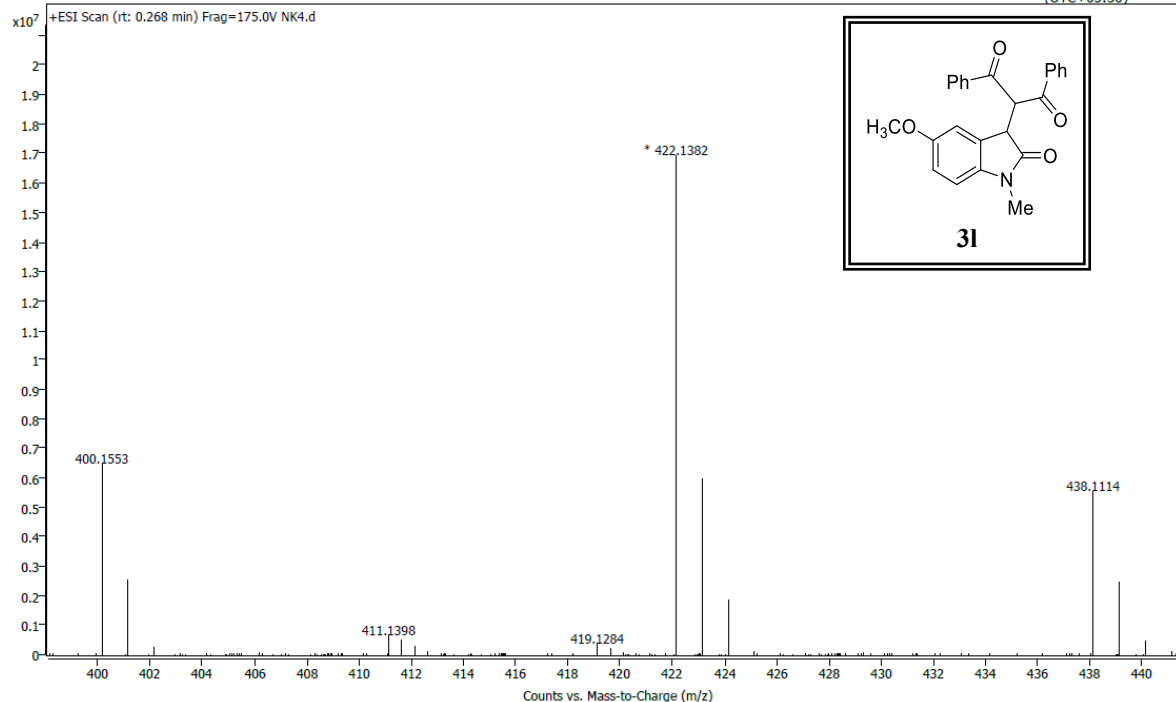

## Spectrum Plot Report

Agilent | Trusted Answers

|                |       |              |         |            |              |                   |                                 |
|----------------|-------|--------------|---------|------------|--------------|-------------------|---------------------------------|
| Name           | NK3   | Rack Pos.    |         | Instrument | Instrument 1 | Operator          |                                 |
| Inj. Vol. (ul) | 2     | Plate Pos.   |         | IRM Status | Success      |                   |                                 |
| Data File      | NK3.d | Method (Acq) | GCN-1.m | Comment    |              | Acq. Time (Local) | 07-05-2024 16:09:10 (UTC+05:30) |

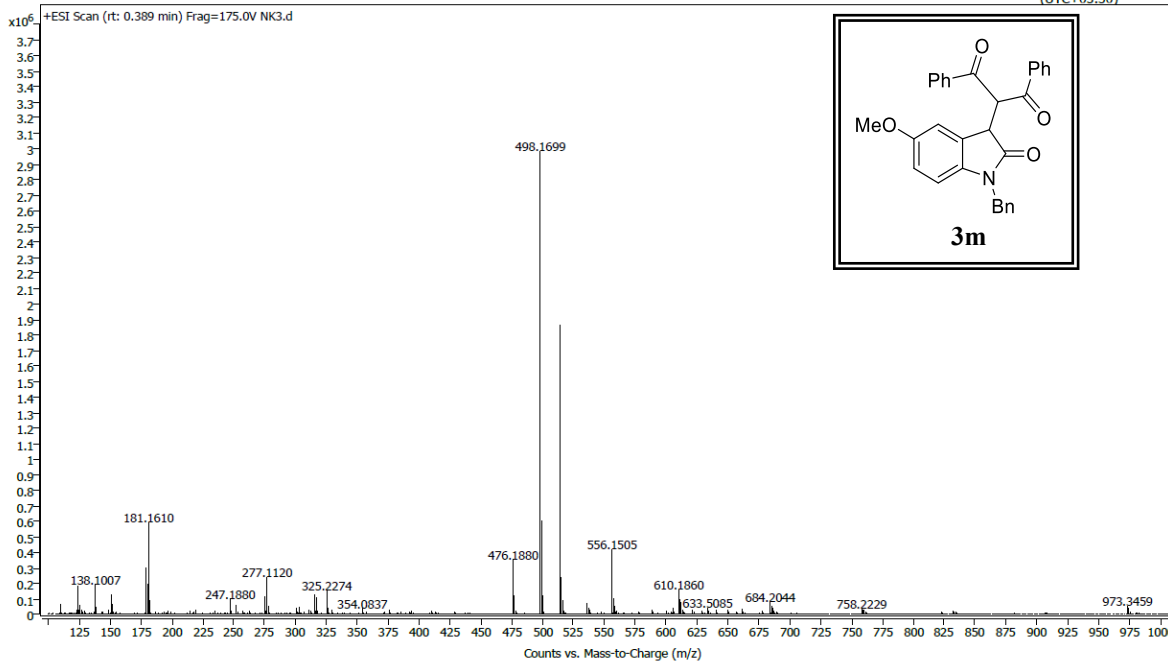

# A Visible Light-Promoted C-H Insertion Reaction of Diazoamides with 1,3-Diketone

Selvaraj Hariharan, Sengodagounder Muthusamy\*

## Spectrum Plot Report

Agilent | Trusted Analyzers

|                |            |              |               |         |                                                   |
|----------------|------------|--------------|---------------|---------|---------------------------------------------------|
| Name           | KH-153-B   | Rack Pos.    | Instrument    | QTOF    | Operator                                          |
| Inj. Vol. (ul) | 2          | Plate Pos.   | IRM Status    | Success |                                                   |
| Data File      | KH-153-B.d | Method (Acq) | GCN-NORMAL1.m | Comment | Acq. Time (Local) 30-11-2023 15:12:42 (UTC+05:30) |

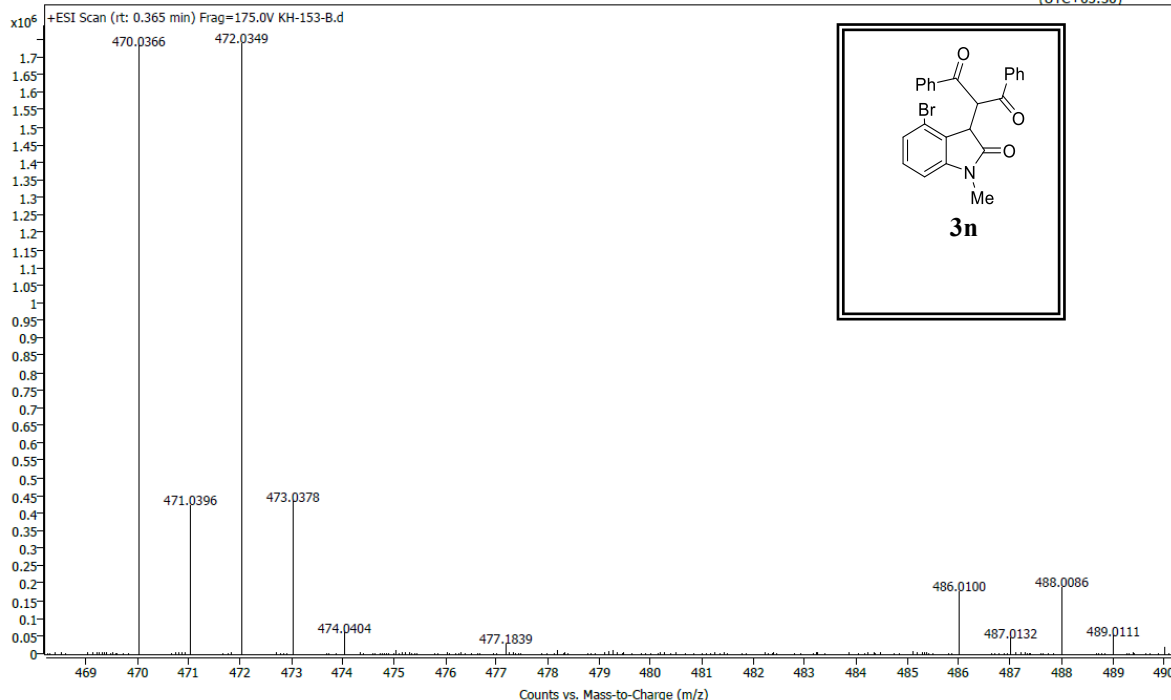

## Spectrum Plot Report

Agilent | Trusted Analyzers

|                |           |              |            |              |                                                   |
|----------------|-----------|--------------|------------|--------------|---------------------------------------------------|
| Name           | NKS 249   | Rack Pos.    | Instrument | Instrument 1 | Operator                                          |
| Inj. Vol. (ul) | 10        | Plate Pos.   | IRM Status | Success      |                                                   |
| Data File      | NKS 249.d | Method (Acq) | GCN-1.m    | Comment      | Acq. Time (Local) 27-06-2024 11:11:22 (UTC+05:30) |

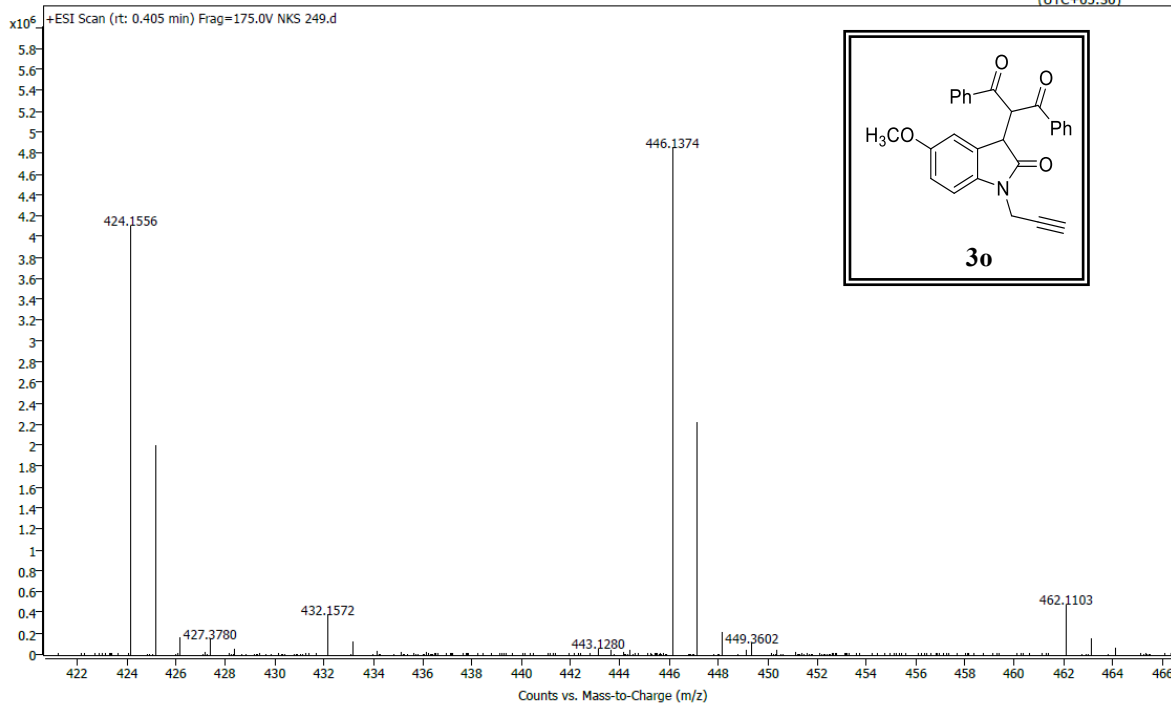

# A Visible Light-Promoted C-H Insertion Reaction of Diazoamides with 1,3-Diketone

Selvaraj Hariharan, Sengodagounder Muthusamy\*

## Spectrum Plot Report

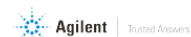

|                |          |              |               |            |         |                   |                                 |
|----------------|----------|--------------|---------------|------------|---------|-------------------|---------------------------------|
| Name           | SHA192   | Rack Pos.    |               | Instrument | QTOF    | Operator          |                                 |
| Inj. Vol. (ul) | 2        | Plate Pos.   |               | IRM Status | Success |                   |                                 |
| Data File      | SHA192.d | Method (Acq) | GCN-NORMAL1.m | Comment    |         | Acq. Time (Local) | 11-12-2023 16:56:41 (UTC+05:30) |

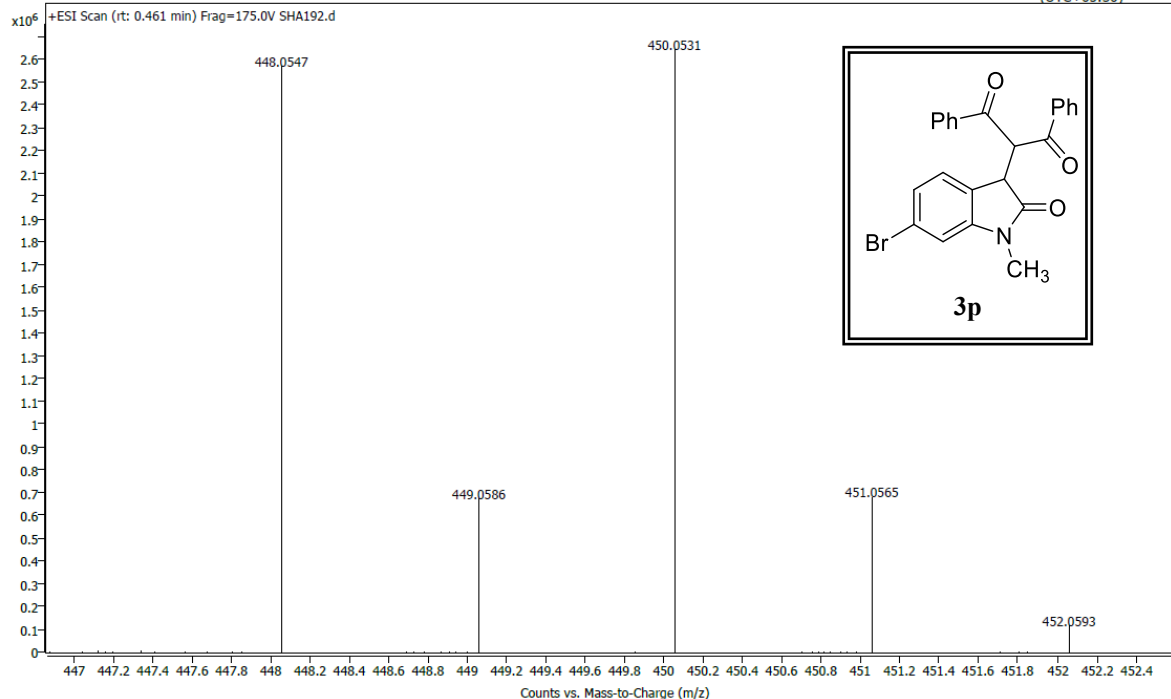

## Spectrum Plot Report

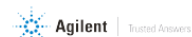

|                |       |              |         |            |              |                   |                                 |
|----------------|-------|--------------|---------|------------|--------------|-------------------|---------------------------------|
| Name           | NK5   | Rack Pos.    |         | Instrument | Instrument 1 | Operator          |                                 |
| Inj. Vol. (ul) | 2     | Plate Pos.   |         | IRM Status | Success      |                   |                                 |
| Data File      | NK5.d | Method (Acq) | GCN-1.m | Comment    |              | Acq. Time (Local) | 10-05-2024 13:48:53 (UTC+05:30) |

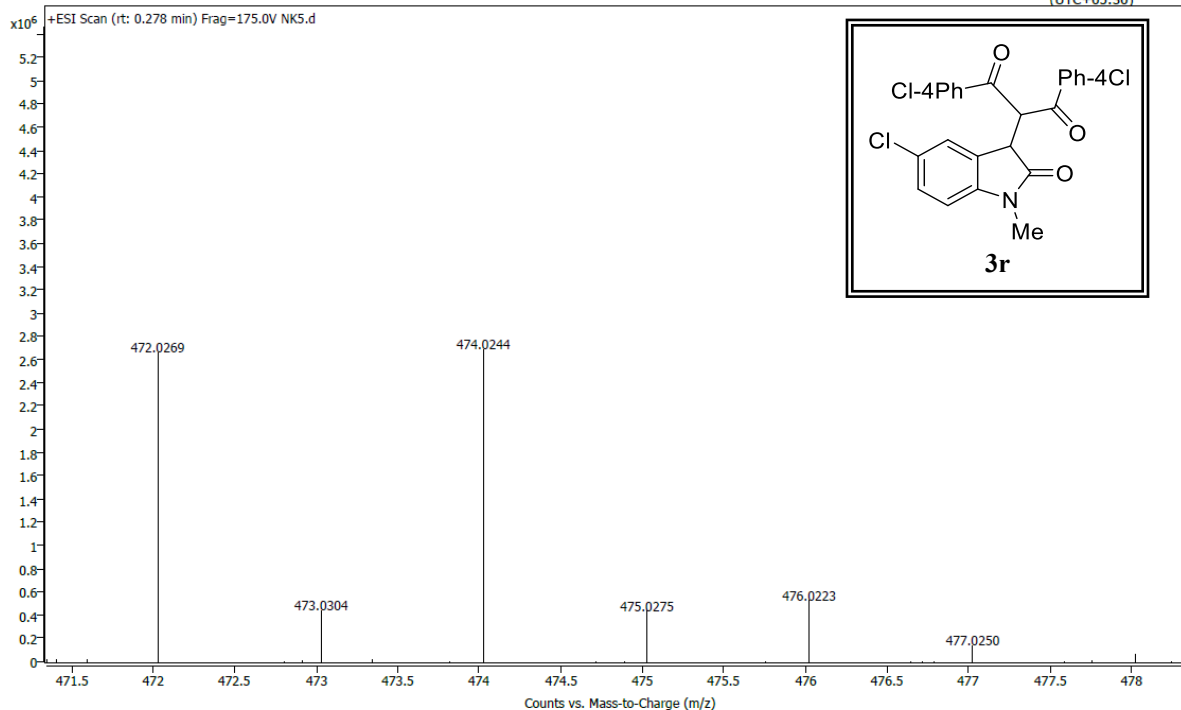

# A Visible Light-Promoted C-H Insertion Reaction of Diazoamides with 1,3-Diketone

Selvaraj Hariharan, Sengodagounder Muthusamy\*

## Spectrum Plot Report

Agilent | Trusted Answers

|                |            |              |               |         |                                                   |
|----------------|------------|--------------|---------------|---------|---------------------------------------------------|
| Name           | KH-145-E   | Rack Pos.    | Instrument    | QTOF    | Operator                                          |
| Inj. Vol. (ul) | 2          | Plate Pos.   | IRM Status    | Success |                                                   |
| Data File      | KH-145-E.d | Method (Acq) | GCN-NORMAL1.m | Comment | Acq. Time (Local) 30-11-2023 15:07:21 (UTC+05:30) |

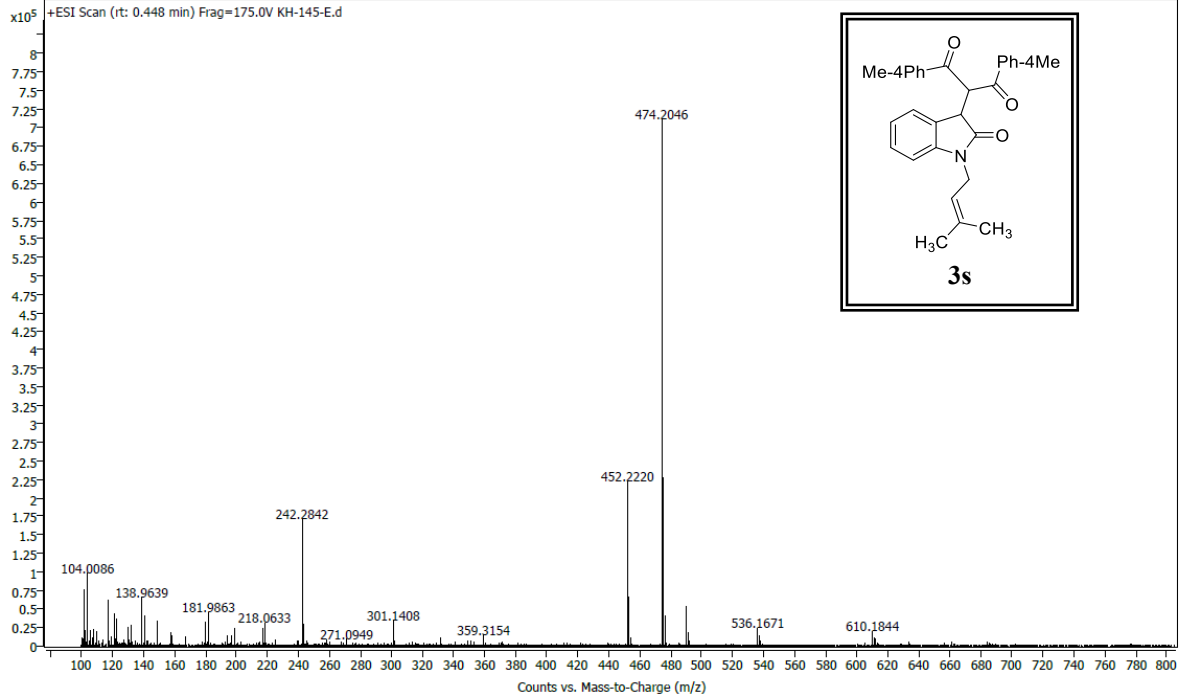

## Spectrum Plot Report

Agilent | Trusted Answers

|                |          |              |            |              |                                                   |
|----------------|----------|--------------|------------|--------------|---------------------------------------------------|
| Name           | NKS217   | Rack Pos.    | Instrument | Instrument 1 | Operator                                          |
| Inj. Vol. (ul) | 10       | Plate Pos.   | IRM Status | Success      |                                                   |
| Data File      | NKS217.d | Method (Acq) | GCN-1.m    | Comment      | Acq. Time (Local) 09-07-2024 11:14:23 (UTC+05:30) |

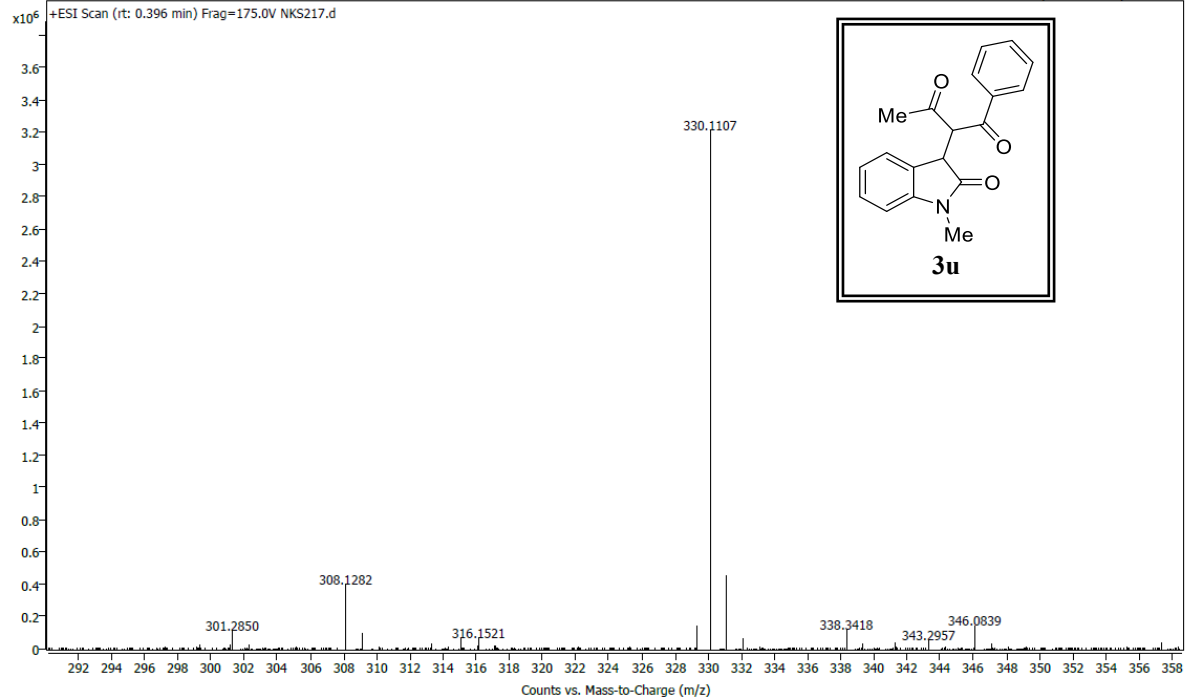

# A Visible Light-Promoted C-H Insertion Reaction of Diazoamides with 1,3-Diketone

Selvaraj Hariharan, Sengodagounder Muthusamy\*

## Spectrum Plot Report

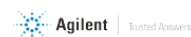

|                |            |              |               |            |         |                   |                                 |
|----------------|------------|--------------|---------------|------------|---------|-------------------|---------------------------------|
| Name           | KH-163-B   | Rack Pos.    |               | Instrument | QTOF    | Operator          |                                 |
| Inj. Vol. (ul) | 2          | Plate Pos.   |               | IRM Status | Success |                   |                                 |
| Data File      | KH-163-B.d | Method (Acq) | GCN-NORMAL1.m | Comment    |         | Acq. Time (Local) | 30-11-2023 15:09:15 (UTC+05:30) |

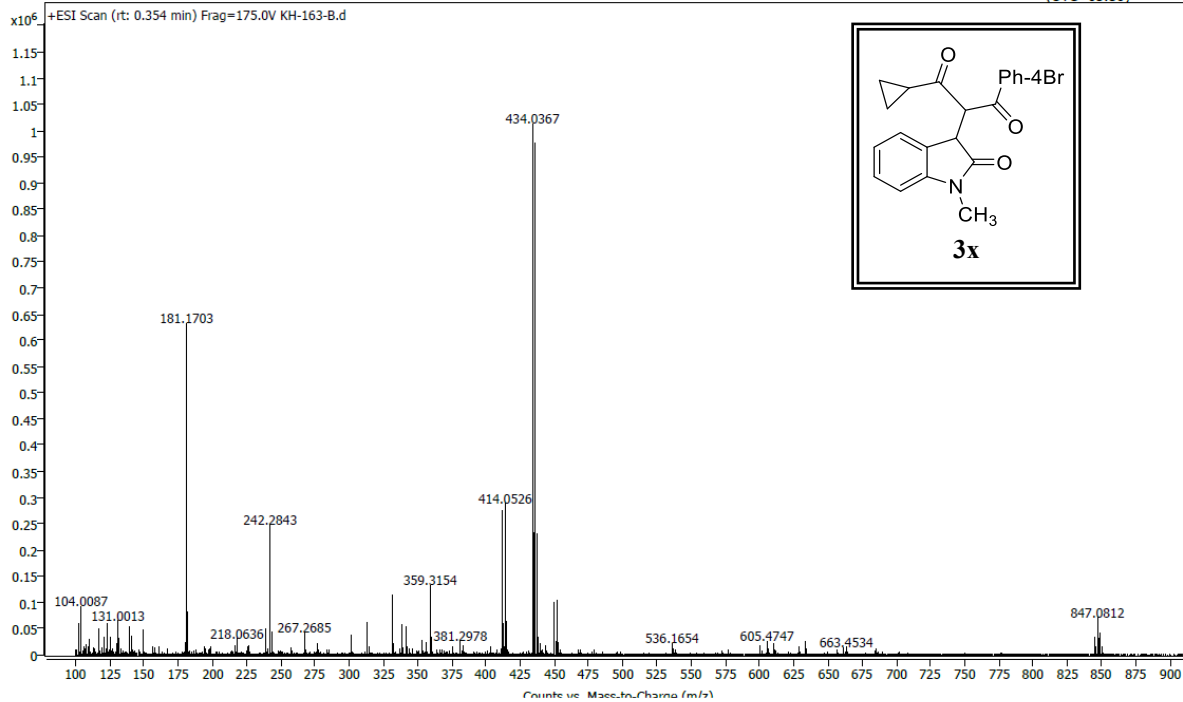

## User Spectrum Plot Report

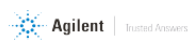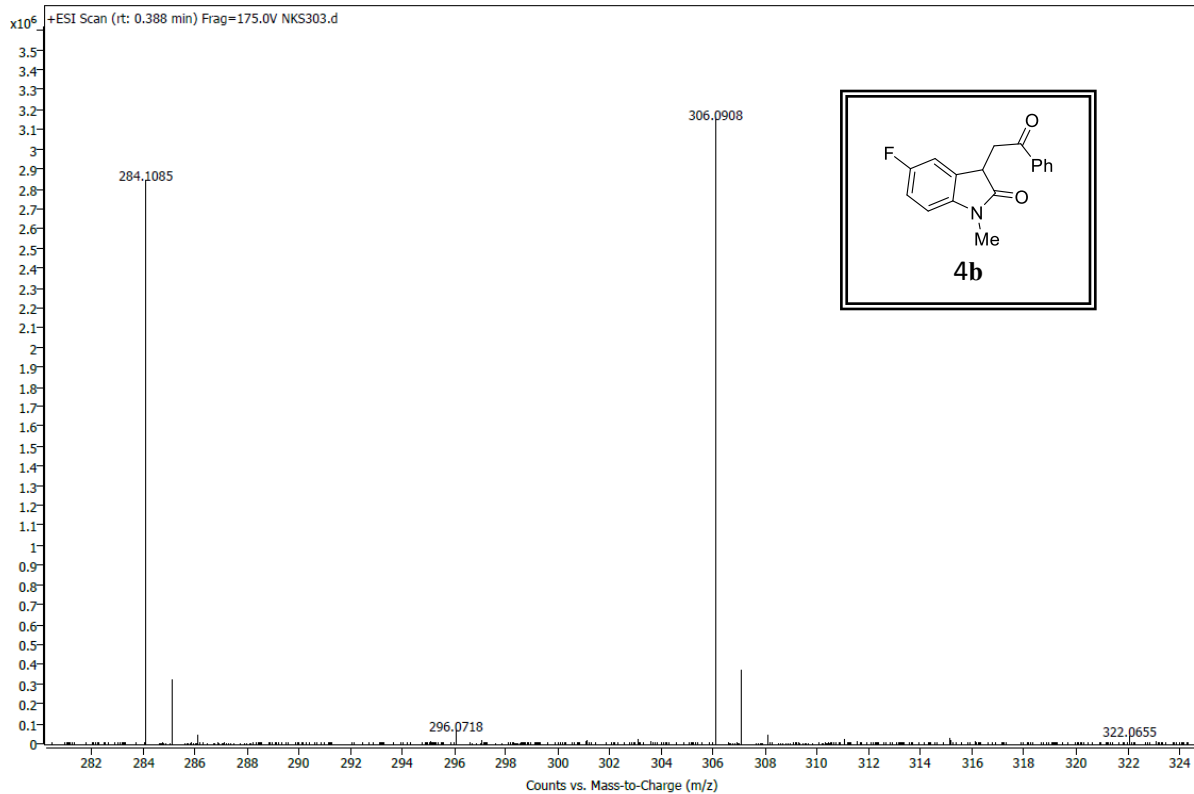

# A Visible Light-Promoted C-H Insertion Reaction of Diazoamides with 1,3-Diketone

Selvaraj Hariharan, Sengodagounder Muthusamy\*

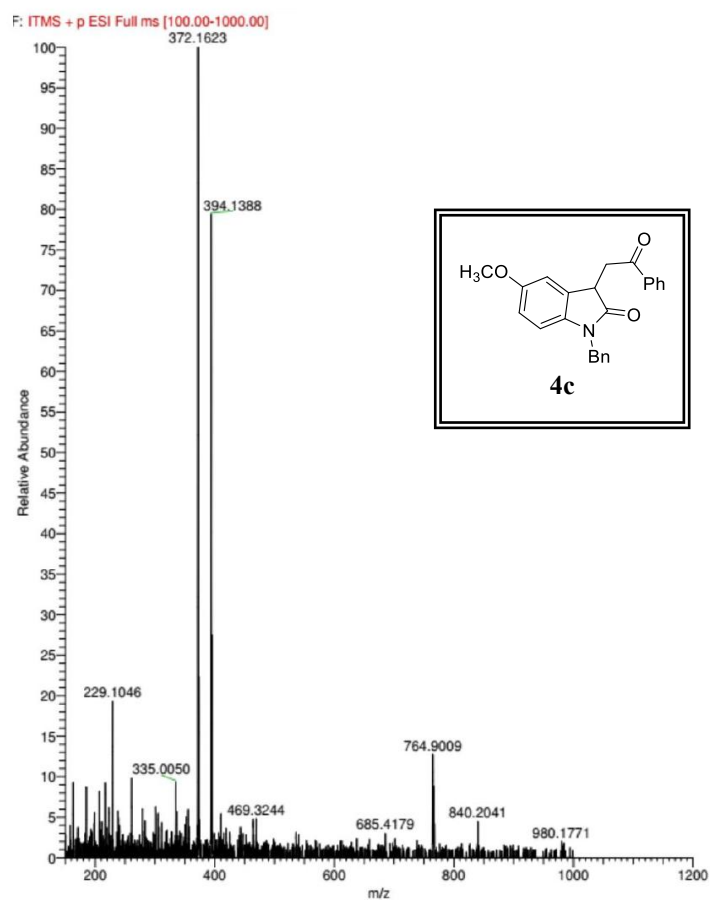

## Spectrum Plot Report

Agilent | Trusted Answers

| Name           | KH-167-3   | Rack Pos.    | Instrument    | QTOF    | Operator                                          |
|----------------|------------|--------------|---------------|---------|---------------------------------------------------|
| Inj. Vol. (ul) | 2          | Plate Pos.   | IRM Status    | Success |                                                   |
| Data File      | KH-167-3.d | Method (Acq) | GCN-NORMAL1.m |         | Acq. Time (Local) 30-11-2023 15:14:24 (UTC+05:30) |

x10<sup>5</sup> +ESI Scan (rt: 0.366 min) Frag=175.0V KH-167-3.d

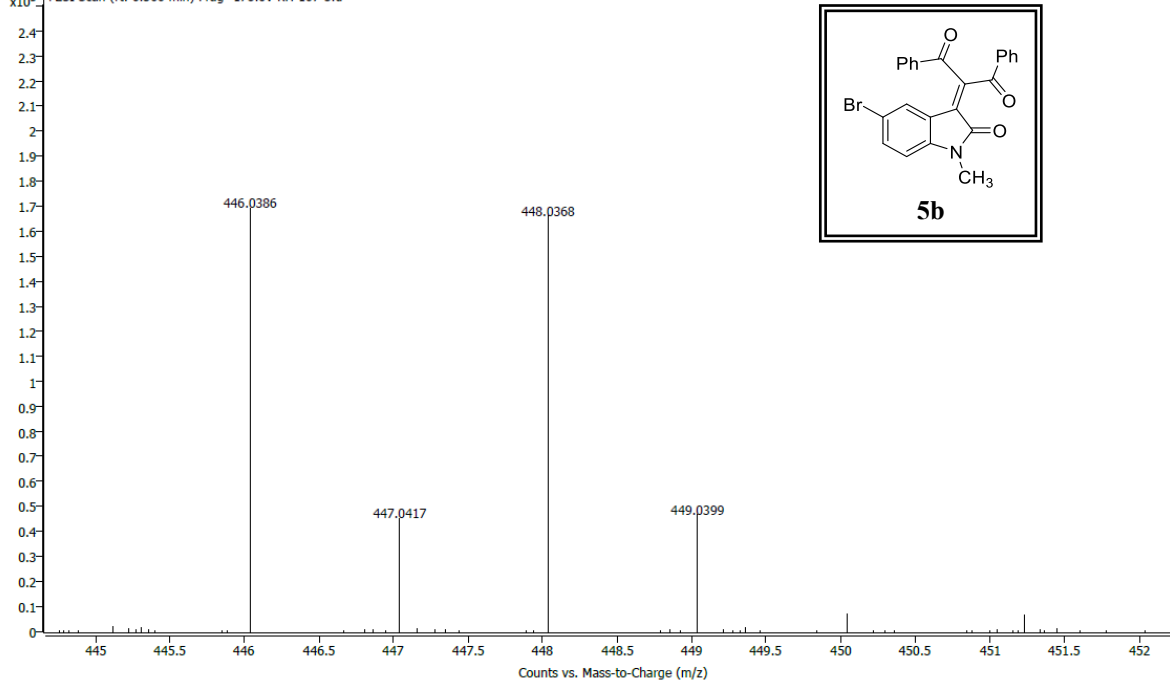

# A Visible Light-Promoted C-H Insertion Reaction of Diazoamides with 1,3-Diketone

Selvaraj Hariharan, Sengodagounder Muthusamy\*

## Spectrum Plot Report

Agilent | Trusted Answers

|                |            |              |               |         |                   |
|----------------|------------|--------------|---------------|---------|-------------------|
| Name           | KH-167-3   | Rack Pos.    | Instrument    | QTOF    | Operator          |
| Inj. Vol. (ul) | 2          | Plate Pos.   | IRM Status    | Success |                   |
| Data File      | KH-167-3.d | Method (Acq) | GCN-NORMAL1.m | Comment | Acq. Time (Local) |

30-11-2023 15:14:24  
(UTC+05:30)

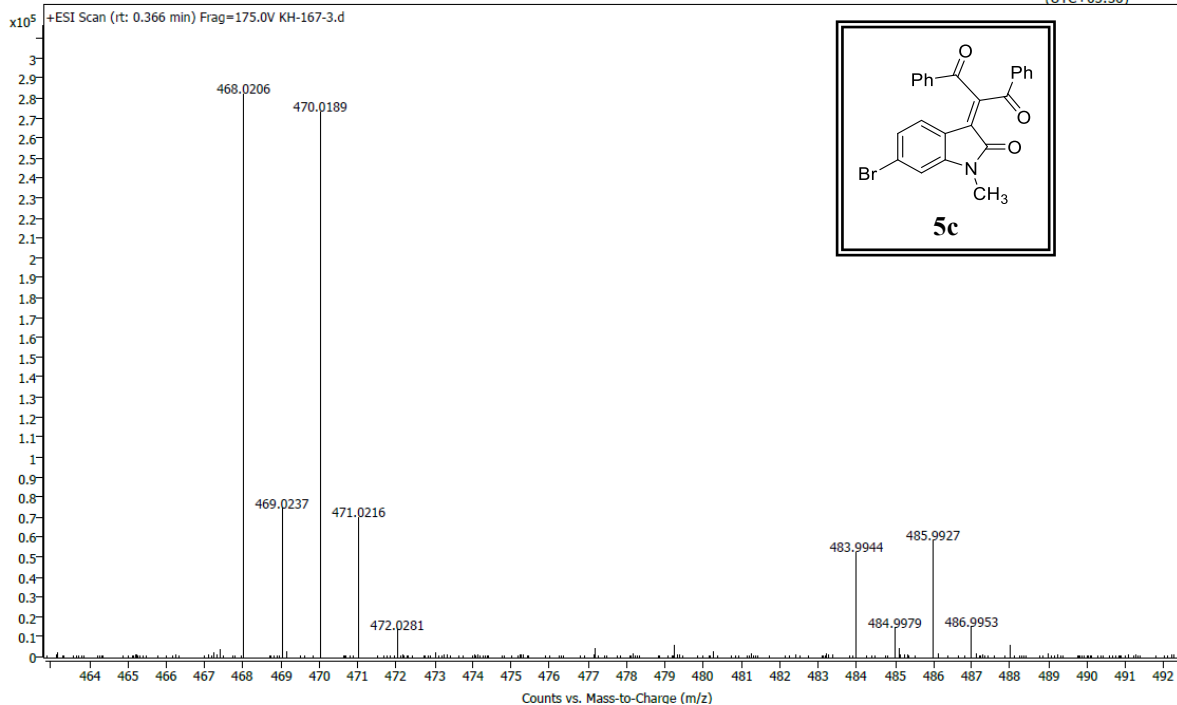

## Spectrum Plot Report

Agilent | Trusted Answers

|                |          |              |            |              |                   |
|----------------|----------|--------------|------------|--------------|-------------------|
| Name           | RN-378   | Rack Pos.    | Instrument | Instrument 1 | Operator          |
| Inj. Vol. (ul) | 10       | Plate Pos.   | IRM Status | Success      |                   |
| Data File      | RN-378.d | Method (Acq) | GCN-1.m    | Comment      | Acq. Time (Local) |

08-11-2024 11:16:22  
(UTC+05:30)

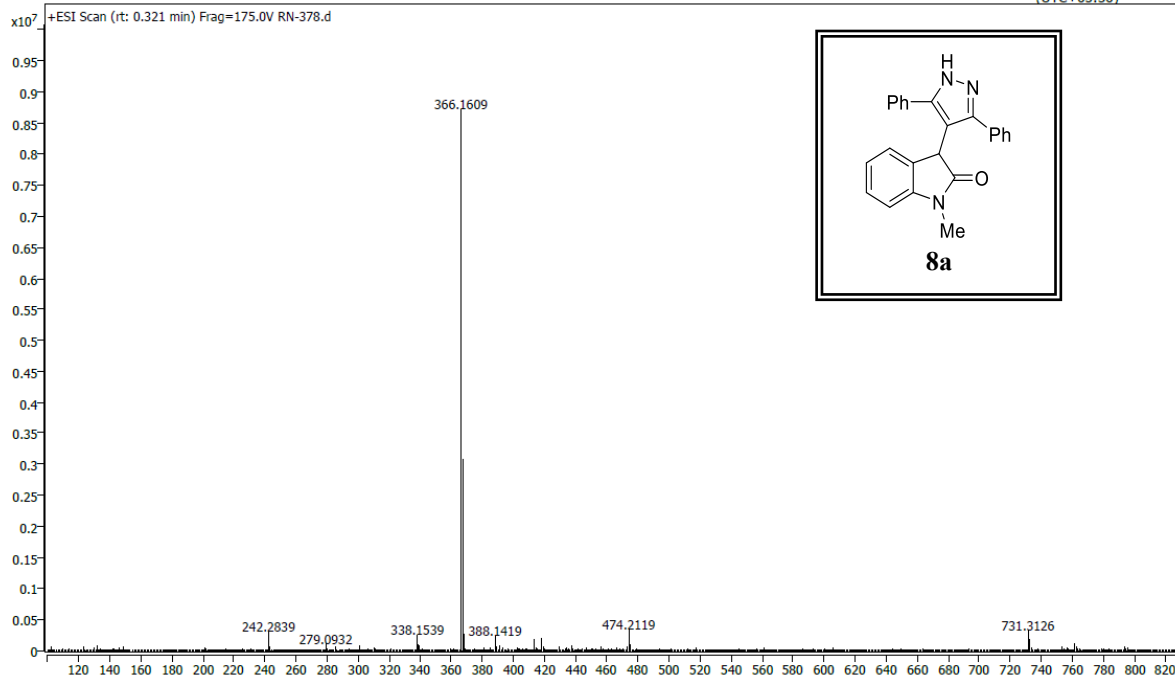

# A Visible Light-Promoted C-H Insertion Reaction of Diazoamides with 1,3-Diketone

Selvaraj Hariharan, Sengodagounder Muthusamy\*

## User Spectrum Plot Report

Agilent | Trusted Answers

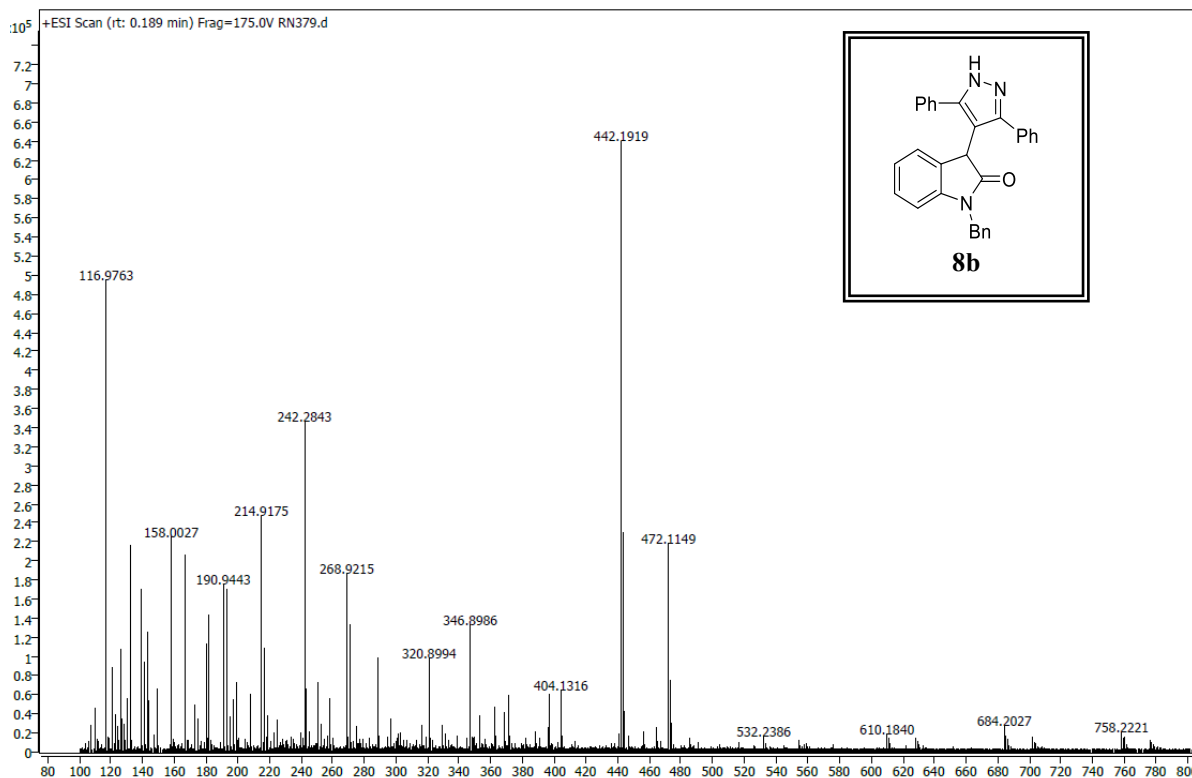

## User Spectrum Plot Report

Agilent | Trusted Answers

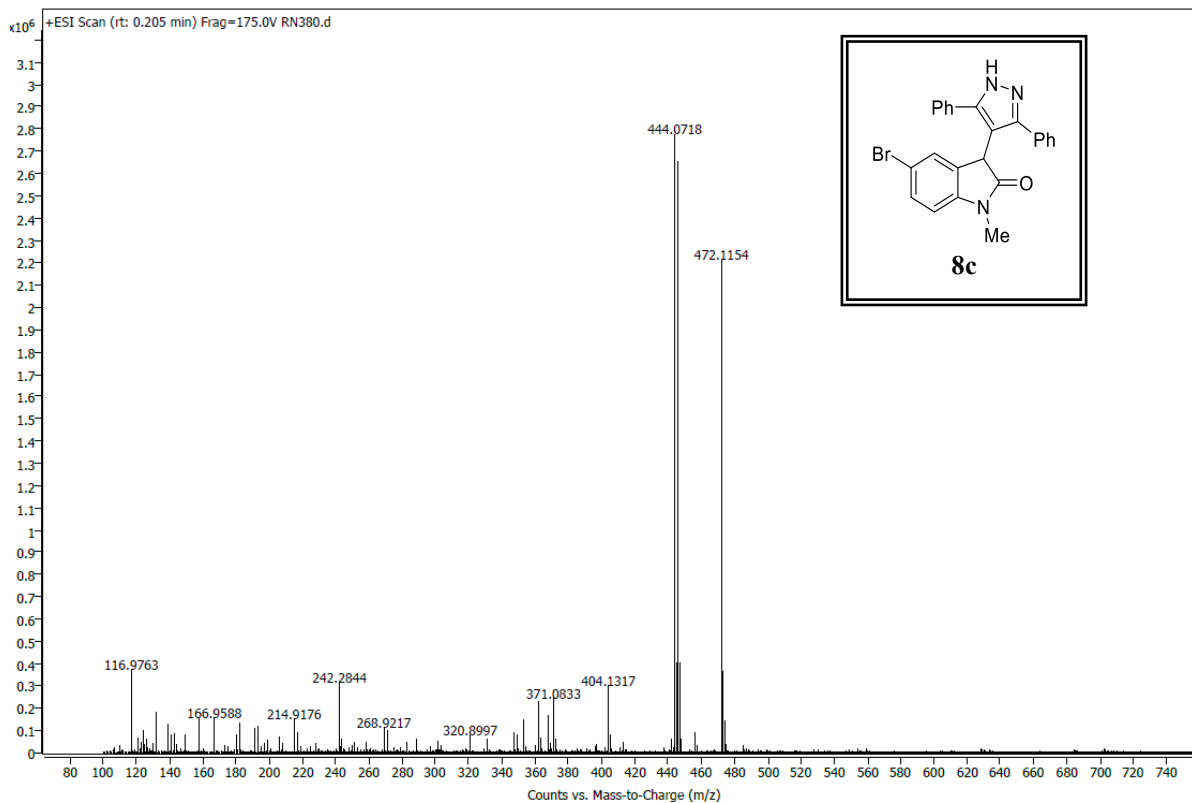

# A Visible Light-Promoted C-H Insertion Reaction of Diazoamides with 1,3-Diketone

Selvaraj Hariharan, Sengodagounder Muthusamy\*

## Spectrum Plot Report

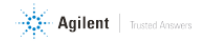

|                |       |              |         |            |              |                   |                                 |
|----------------|-------|--------------|---------|------------|--------------|-------------------|---------------------------------|
| Name           | NK1   | Rack Pos.    |         | Instrument | Instrument 1 | Operator          |                                 |
| Inj. Vol. (ul) | 2     | Plate Pos.   |         | IRM Status | Success      |                   |                                 |
| Data File      | NK1.d | Method (Acq) | GCN-1.m | Comment    |              | Acq. Time (Local) | 10-05-2024 13:42:14 (UTC+05:30) |

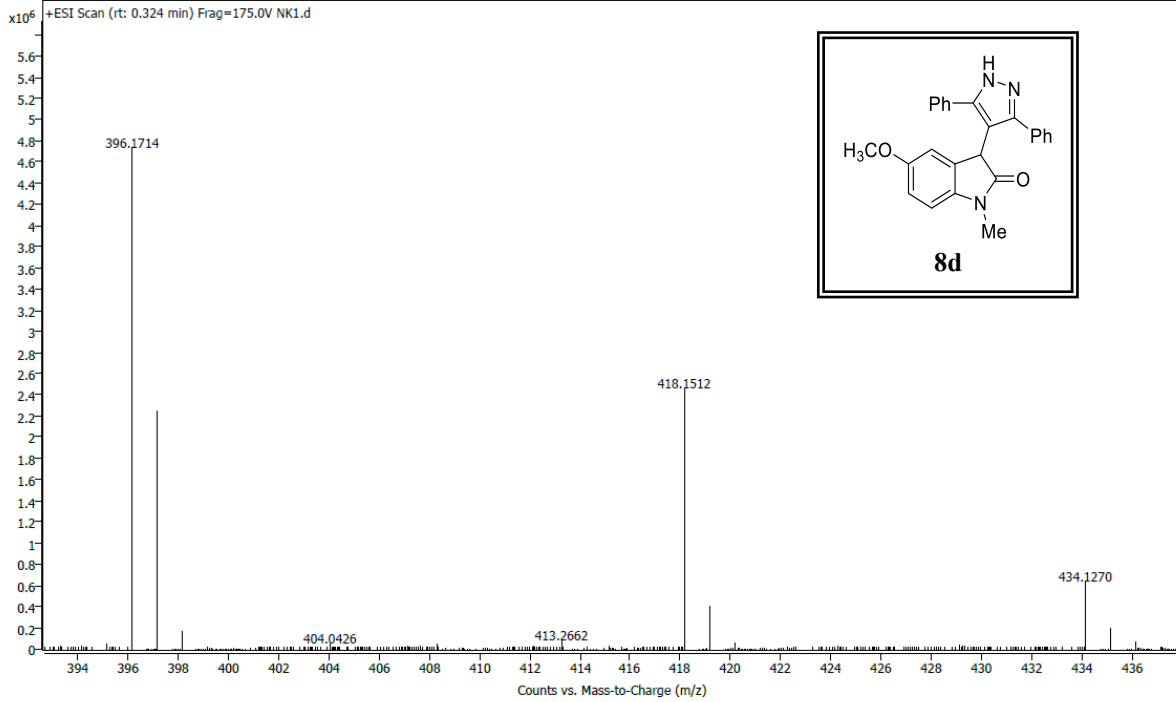

# A Visible Light-Promoted C-H Insertion Reaction of Diazoamides with 1,3-Diketone

Selvaraj Hariharan, Sengodagounder Muthusamy\*

## Spectrum Plot Report

Agilent | Trusted Answers

|                |          |              |         |            |              |                   |                                 |
|----------------|----------|--------------|---------|------------|--------------|-------------------|---------------------------------|
| Name           | NKS288   | Rack Pos.    |         | Instrument | Instrument 1 | Operator          |                                 |
| Inj. Vol. (ul) | 10       | Plate Pos.   |         | IRM Status | Success      |                   |                                 |
| Data File      | NKS288.d | Method (Acq) | GCN-1.m | Comment    |              | Acq. Time (Local) | 25-06-2024 12:45:06 (UTC+05:30) |

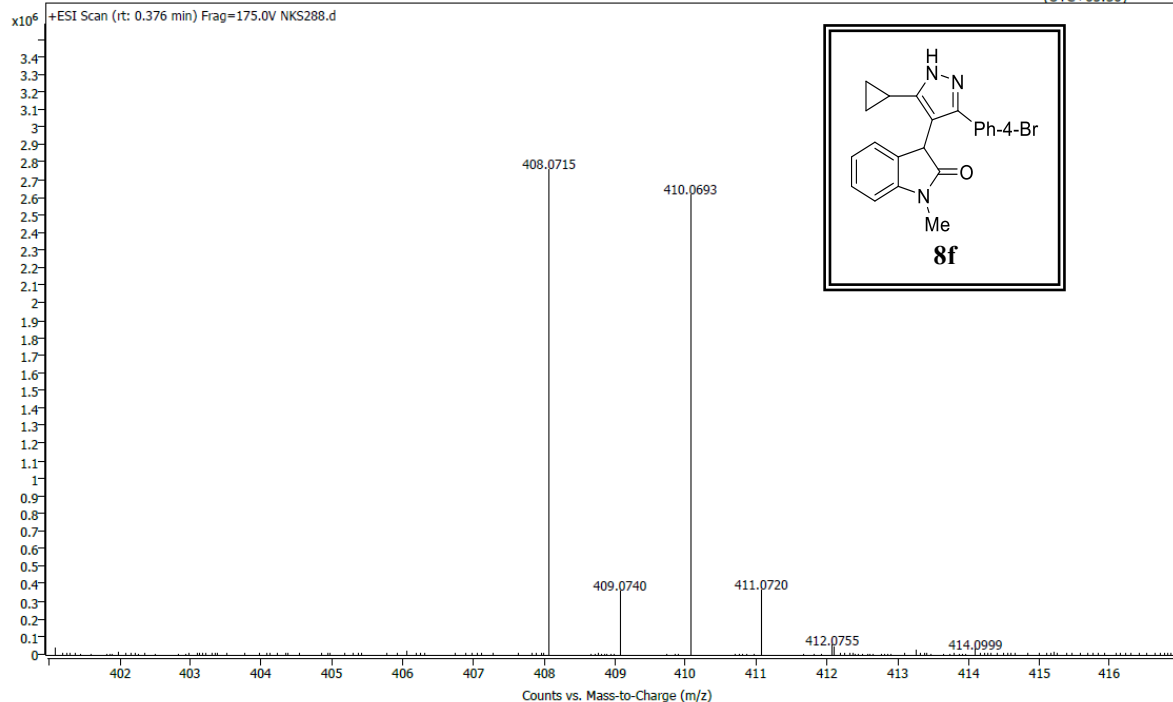

## User Spectrum Plot Report

Agilent | Trusted Answers

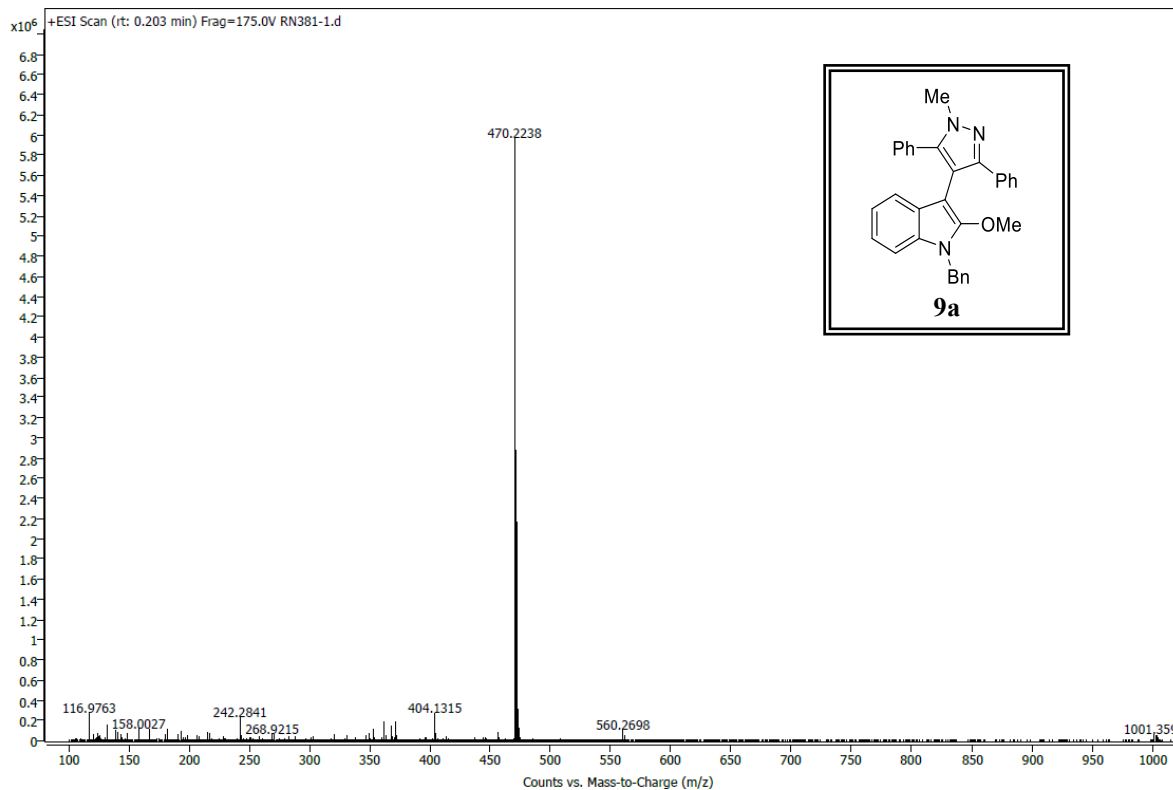

# A Visible Light-Promoted C-H Insertion Reaction of Diazoamides with 1,3-Diketone

Selvaraj Hariharan, Sengodagounder Muthusamy\*

| Name           | RN409   | Rack Pos.    | Instrument | Instrument 1 | Operator                                          |
|----------------|---------|--------------|------------|--------------|---------------------------------------------------|
| Inj. Vol. (ul) | 10      | Plate Pos.   | IRM Status | Success      |                                                   |
| Data File      | RN409.d | Method (Acq) | GCN-1.m    | Comment      | Acq. Time (Local) 17-12-2024 15:29:40 (UTC+05:30) |

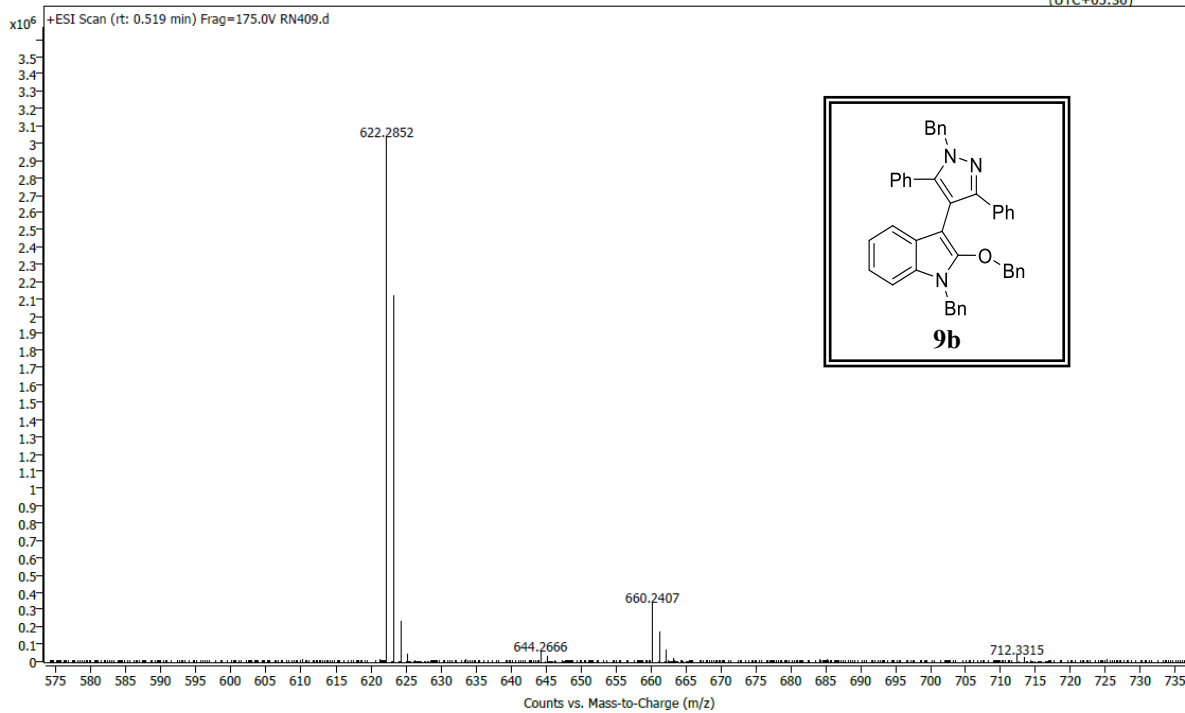

| Name           | RN387   | Rack Pos.    | Instrument | Instrument 1 | Operator                                          |
|----------------|---------|--------------|------------|--------------|---------------------------------------------------|
| Inj. Vol. (ul) | 10      | Plate Pos.   | IRM Status | Success      |                                                   |
| Data File      | RN387.d | Method (Acq) | GCN-1.m    | Comment      | Acq. Time (Local) 17-12-2024 15:17:55 (UTC+05:30) |

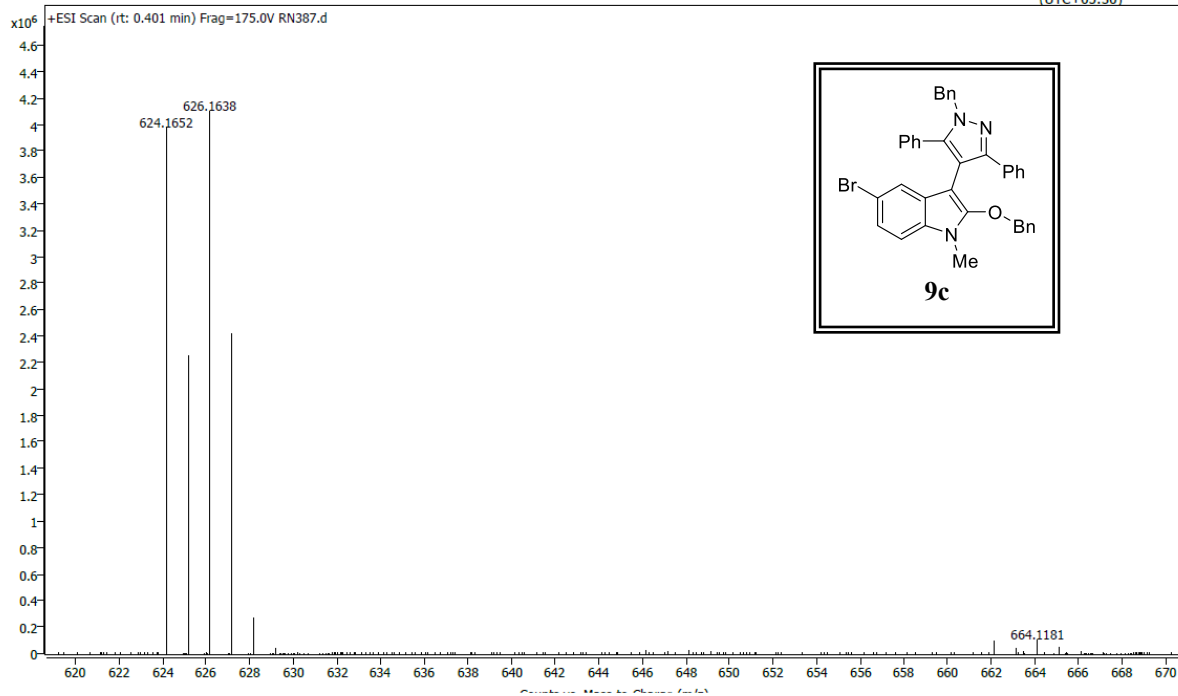

# A Visible Light-Promoted C-H Insertion Reaction of Diazoamides with 1,3-Diketone

Selvaraj Hariharan, Sengodagounder Muthusamy\*

|                |         |              |         |            |              |                   |                                 |
|----------------|---------|--------------|---------|------------|--------------|-------------------|---------------------------------|
| Name           | RN393   | Rack Pos.    |         | Instrument | Instrument 1 | Operator          |                                 |
| Inj. Vol. (ul) | 10      | Plate Pos.   |         | IRM Status | Success      |                   |                                 |
| Data File      | RN393.d | Method (Acq) | GCN-1.m | Comment    |              | Acq. Time (Local) | 17-12-2024 15:16:19 (UTC+05:30) |

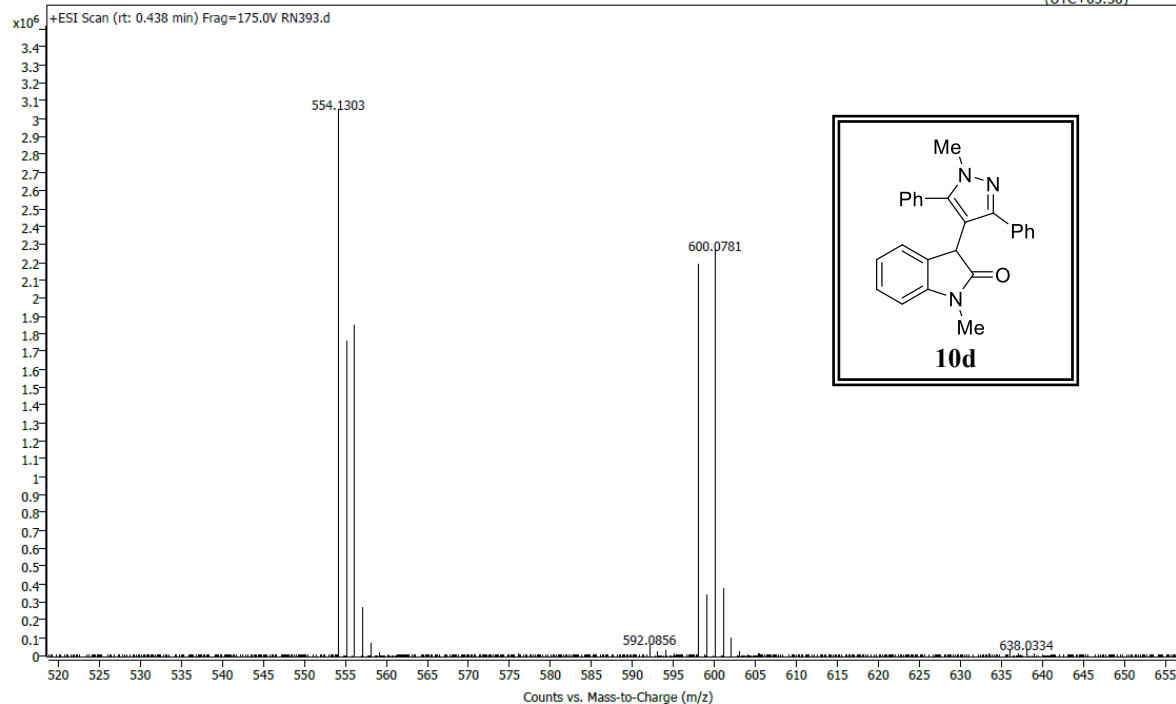

## User Spectrum Plot Report

Agilent | Trusted Answers

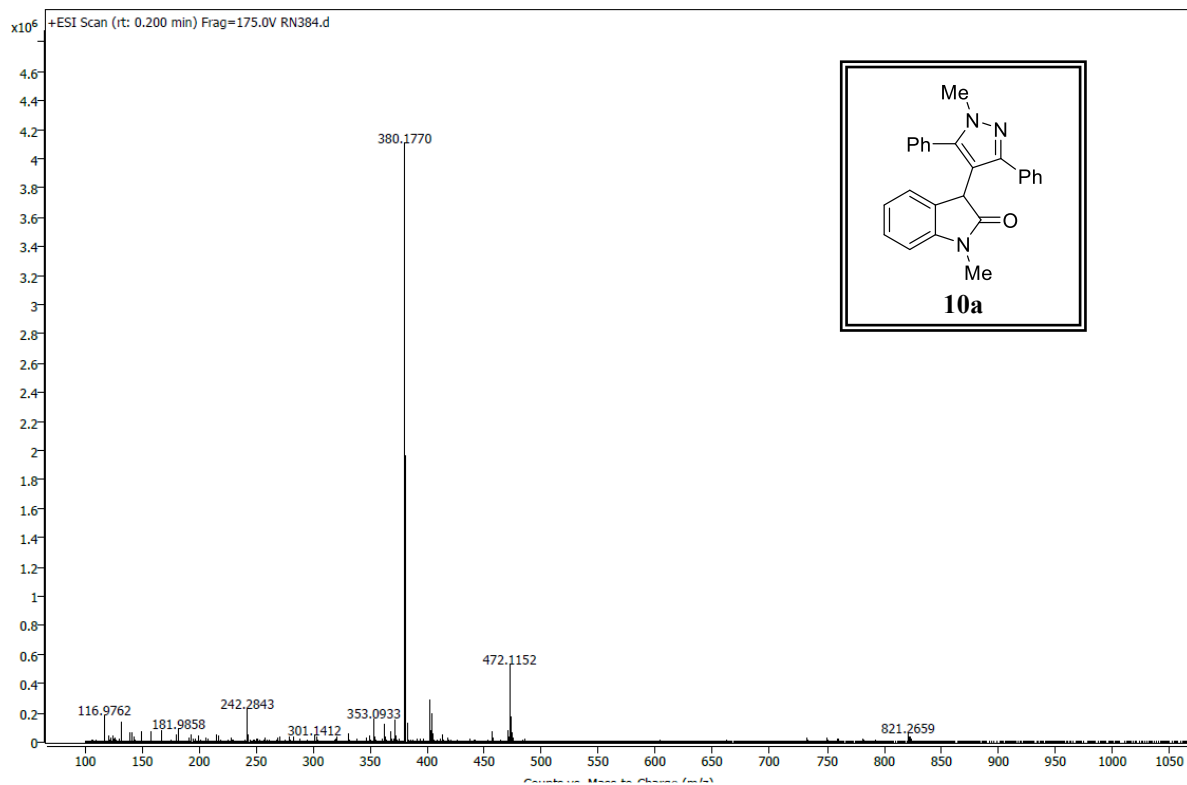

# A Visible Light-Promoted C-H Insertion Reaction of Diazoamides with 1,3-Diketone

Selvaraj Hariharan, Sengodagounder Muthusamy\*

T: FTMS + p ESI Full ms [100.0000-1000.0000]

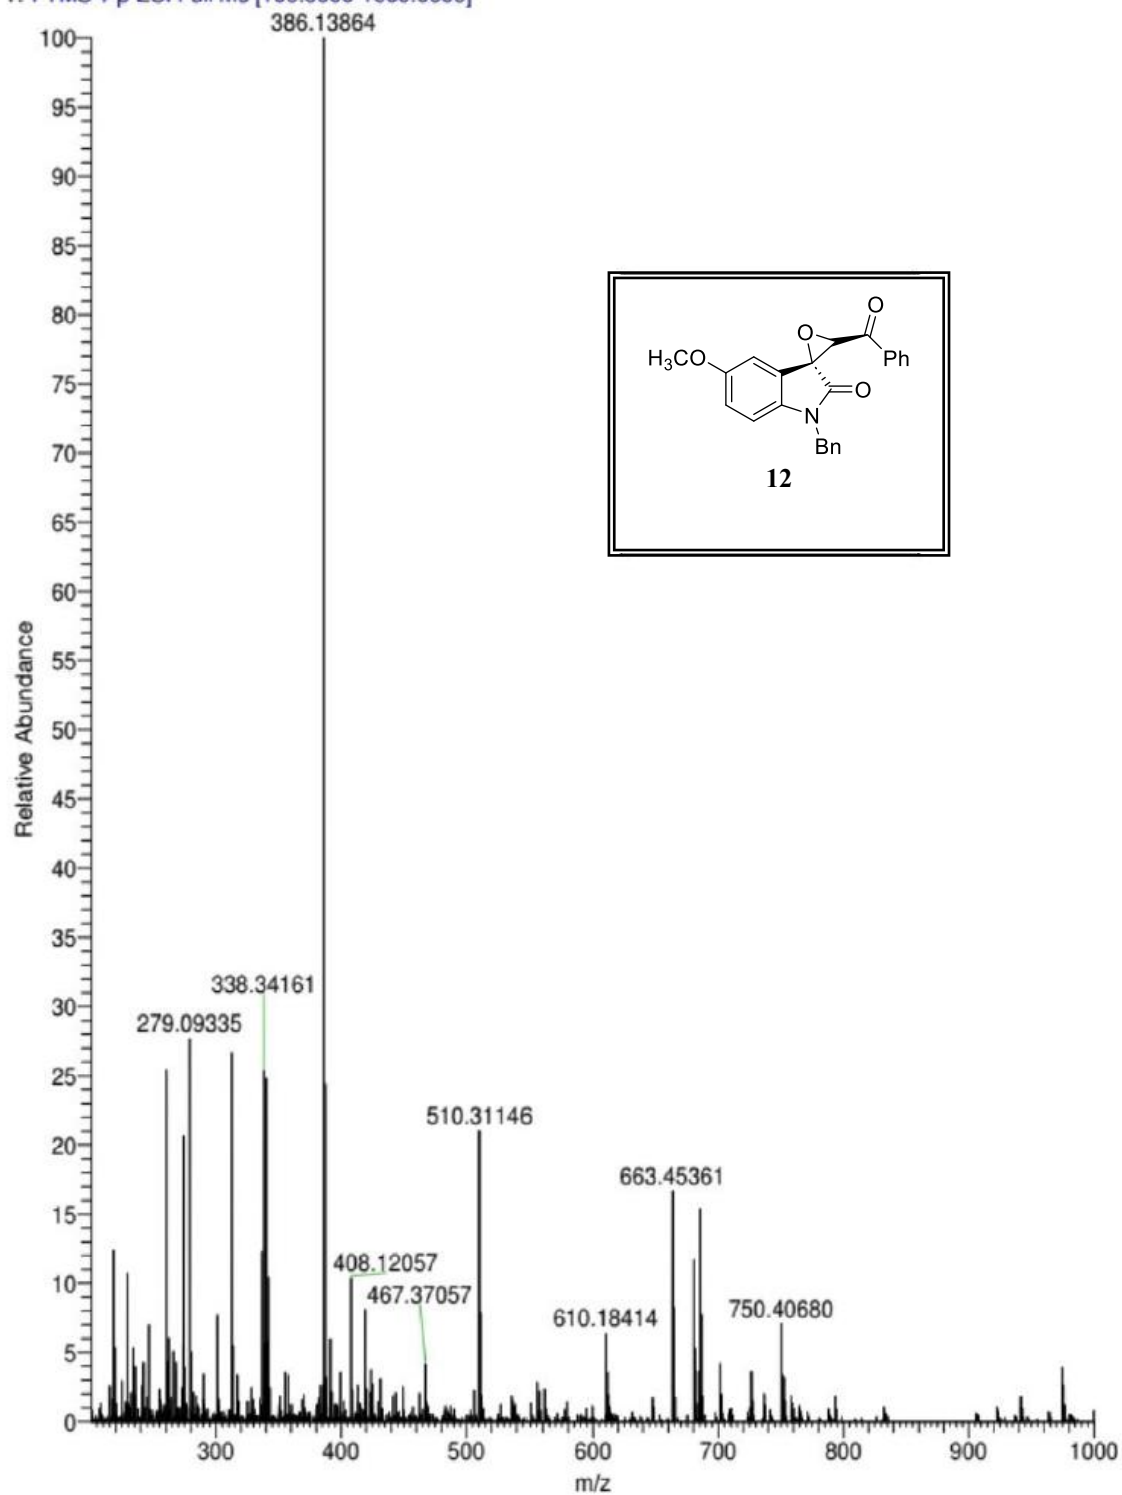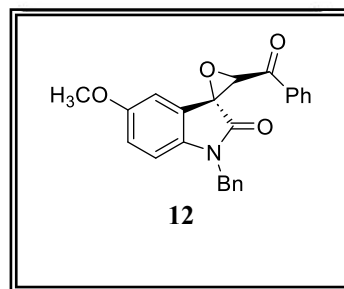

# A Visible Light-Promoted C-H Insertion Reaction of Diazoamides with 1,3-Diketone

Selvaraj Hariharan, Sengodagounder Muthusamy\*

## Spectrum Plot Report

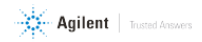

|                |          |              |         |            |              |                   |                                    |
|----------------|----------|--------------|---------|------------|--------------|-------------------|------------------------------------|
| Name           | SKS273   | Rack Pos.    |         | Instrument | Instrument 1 | Operator          |                                    |
| Inj. Vol. (ul) | 10       | Plate Pos.   |         | IRM Status | Success      |                   |                                    |
| Data File      | SKS273.d | Method (Acq) | GCN-1.m | Comment    |              | Acq. Time (Local) | 11-07-2024 11:55:54<br>(UTC+05:30) |

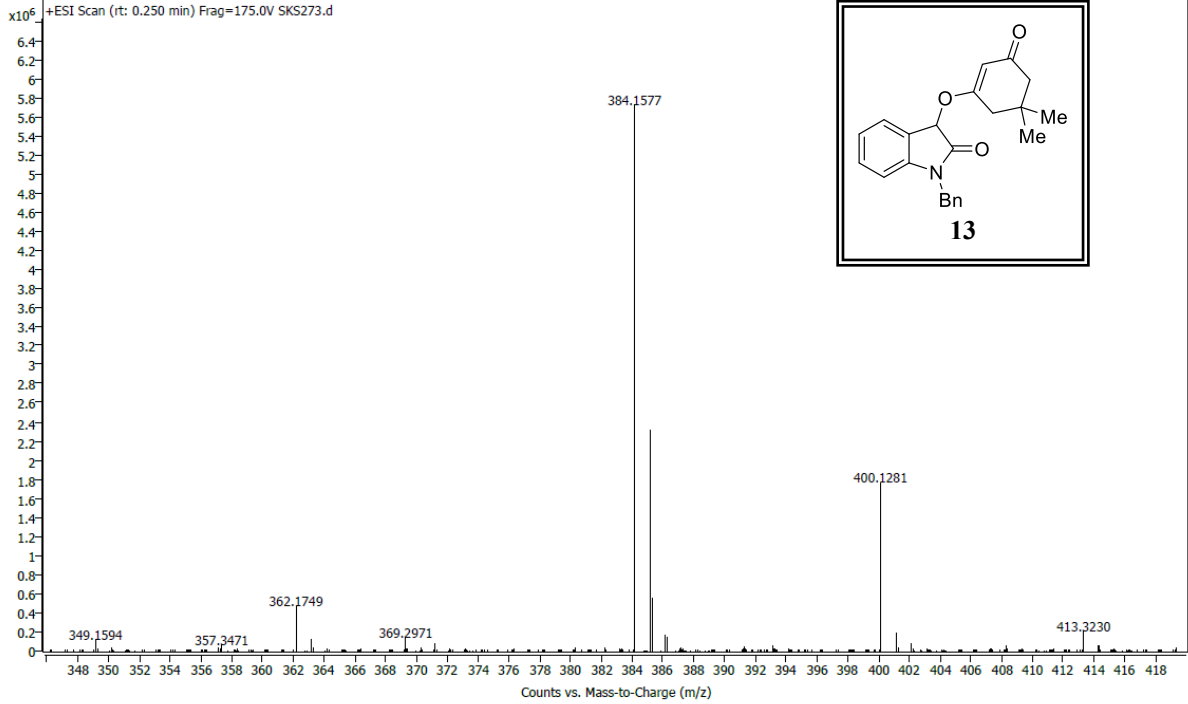

Supplement: d5nj04942c2.pdf [file d5nj04942c2.pdf]
